# Supplementary material for: Substrate Dynamics Contribute to Enzymatic Specificity in Human and Bacterial Methionine Adenosyltransferases
Source: PubMed Central journal article supplement — JACS Au. 2021 Nov 19;1(12):2349–60. doi: 10.1021/jacsau.1c00464 (PMC8715544; doi:10.1021/jacsau.1c00464), 2021-11-19
Supplement: au1c00464_si_001.pdf [file au1c00464_si_001.pdf]

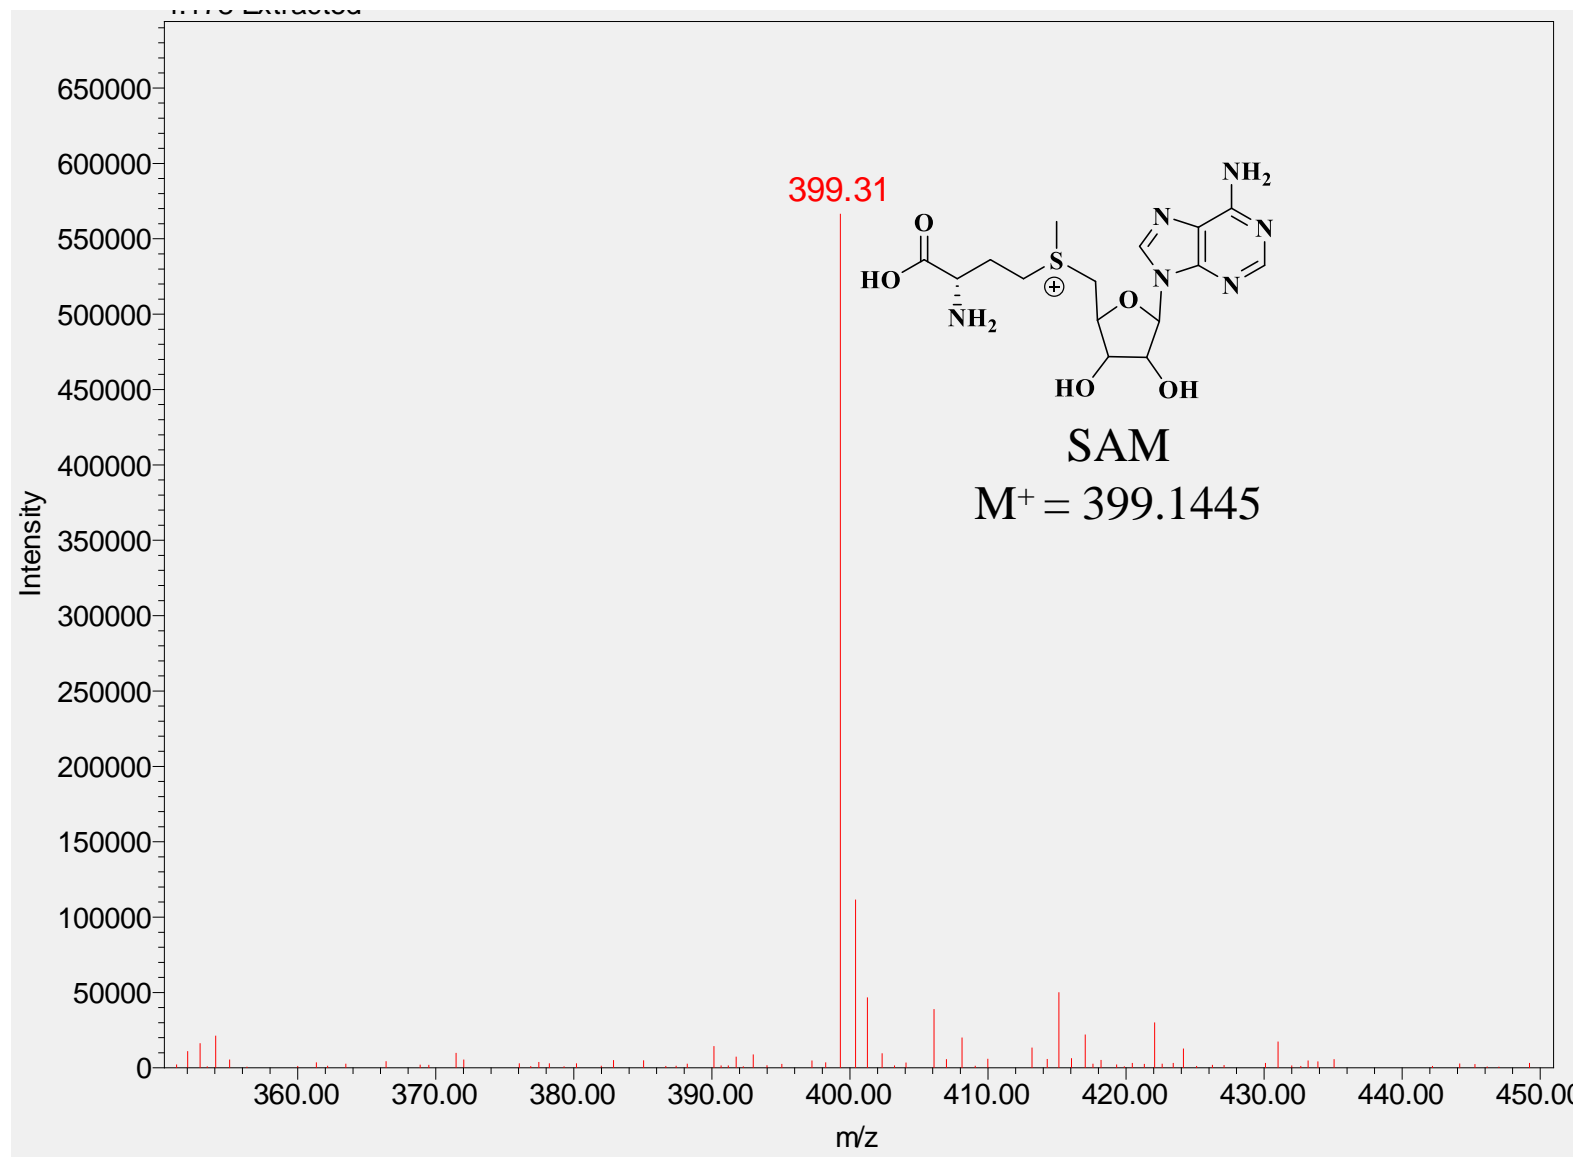

**Mass spectrum of SAM using Acquity UPLC H-Class System with Acquity QDa Detector.** Mass of SAM extracted at retention time 4.1 min, showing expected 399.31 mass.

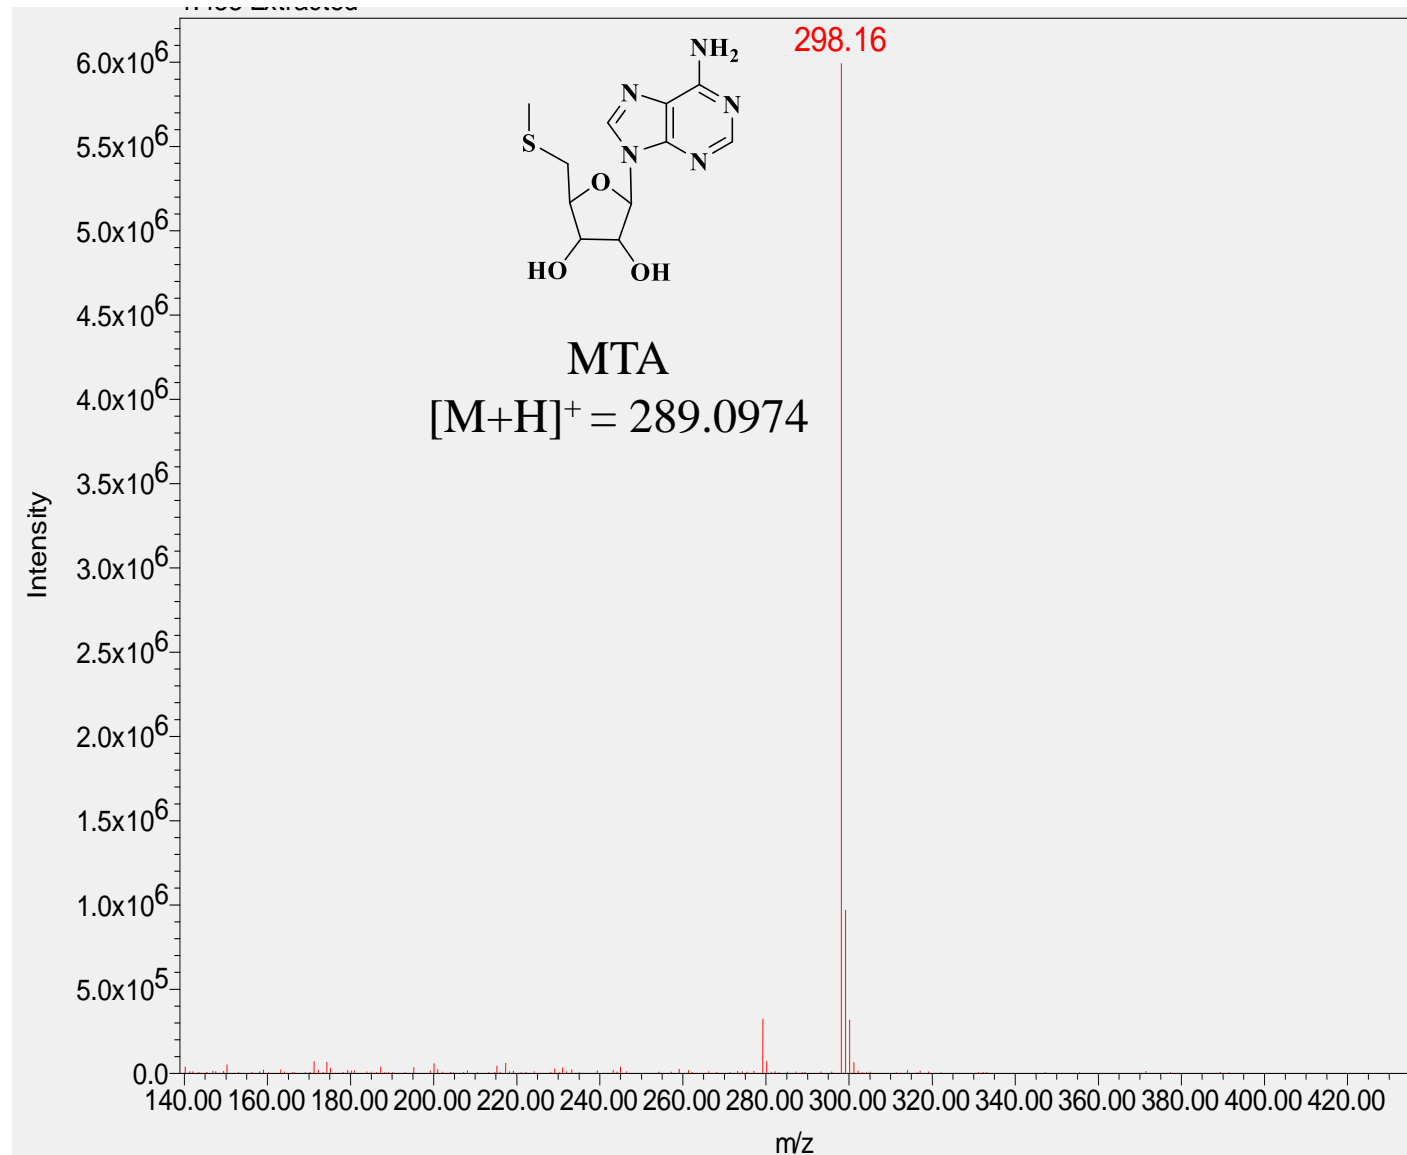

**Mass spectrum of MTA using Acquity UPLC H-Class System with Acquity QDa Detector.** Mass of MTA extracted at retention time 1.3 min, showing expected mass 298.16 [M+H]<sup>+</sup>.

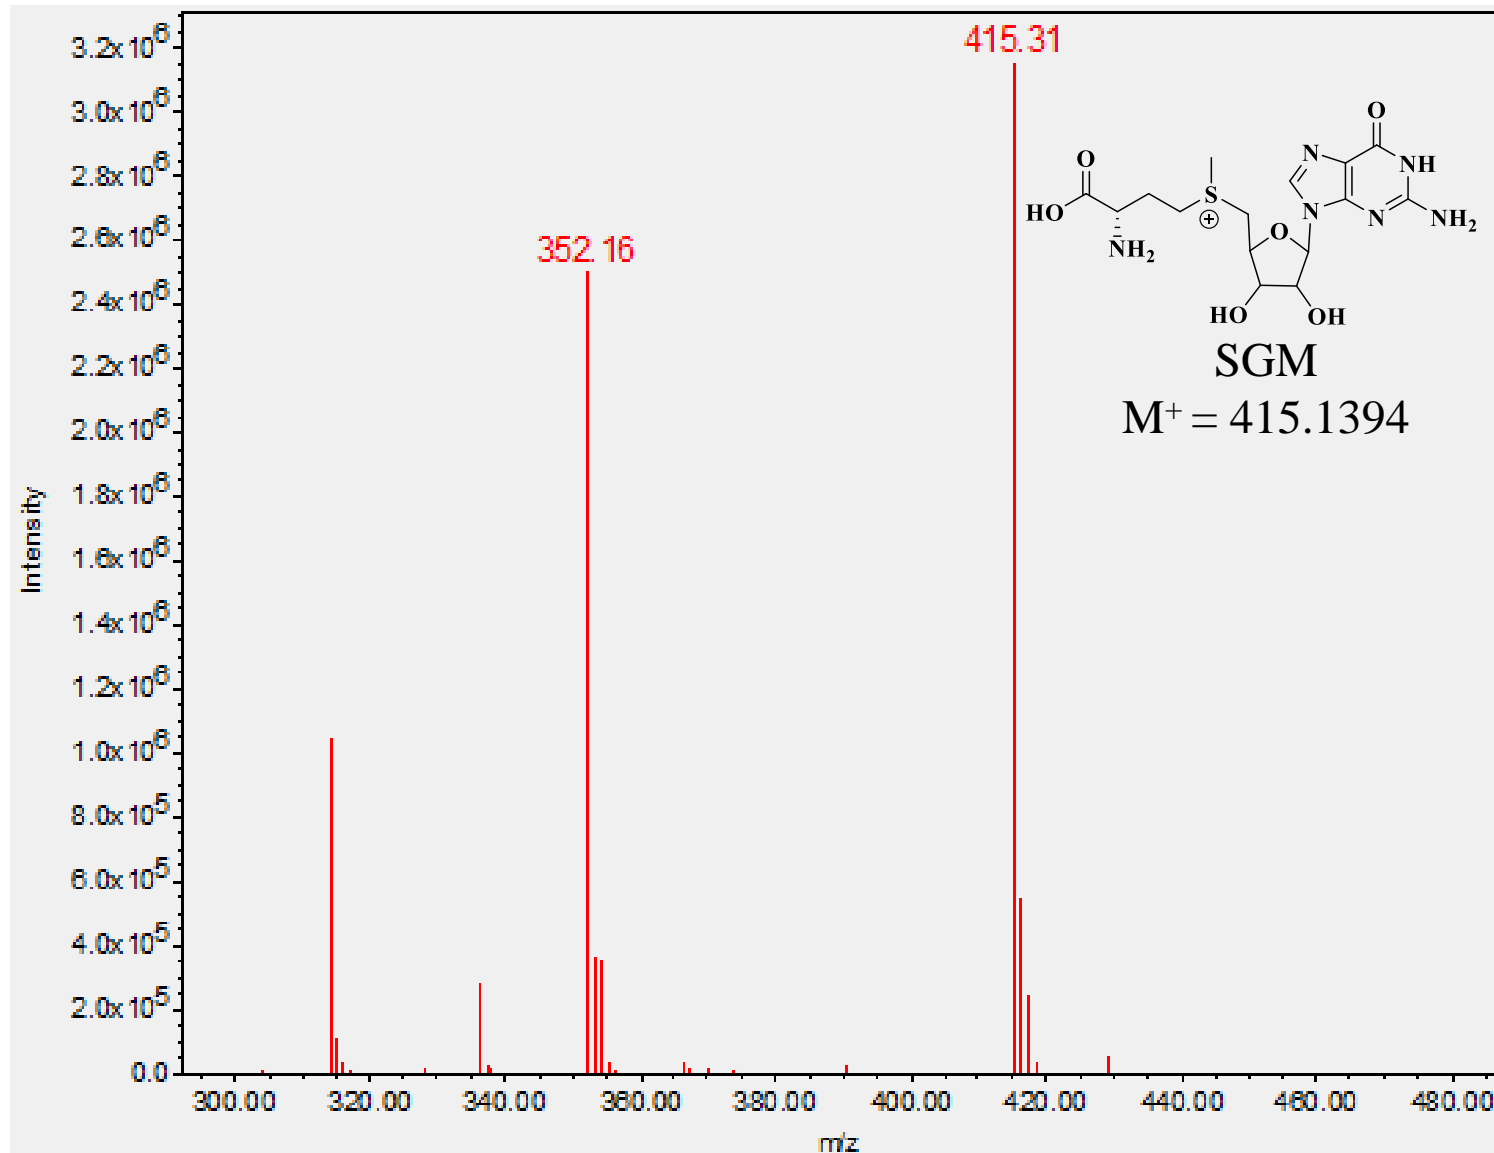

**Mass spectrum of SGM using Acquity UPLC H-Class System with Acquity QDa Detector.** Mass of SGM extracted at retention time 5.3 min, showing expected mass 415.31.

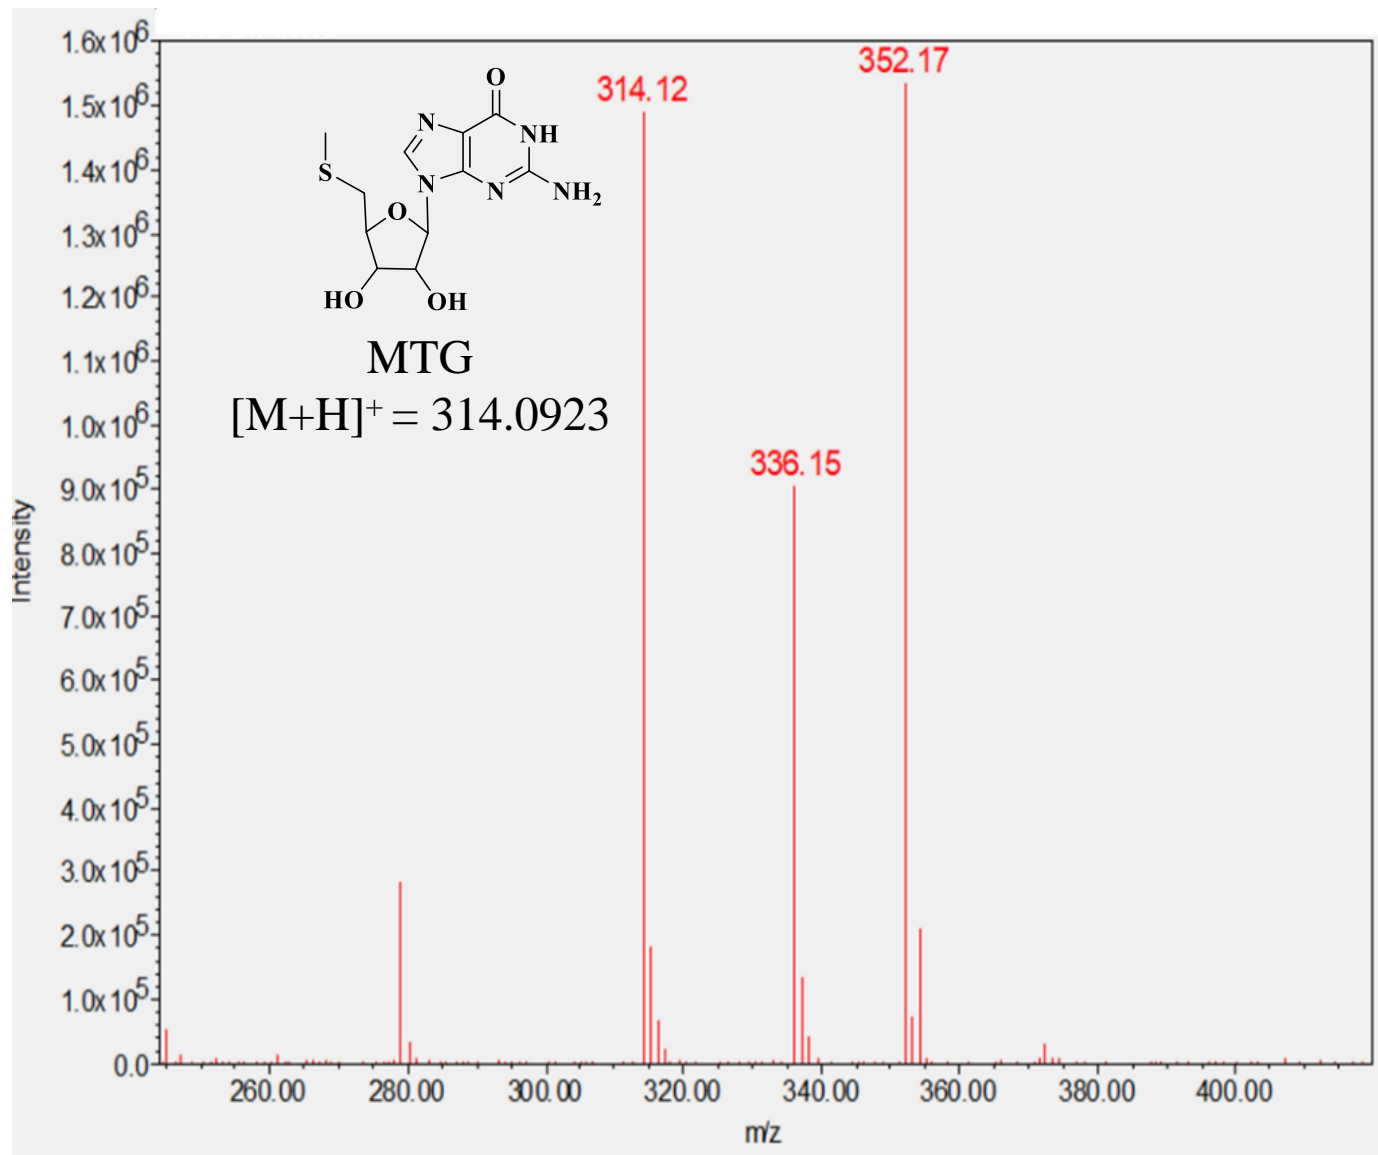

**Mass spectrum of MTG using Acquity UPLC H-Class System with Acquity QDa Detector.** Mass of MTG extracted at retention time 1.5 min, showing expected mass 314.12 [M+H]<sup>+</sup>.

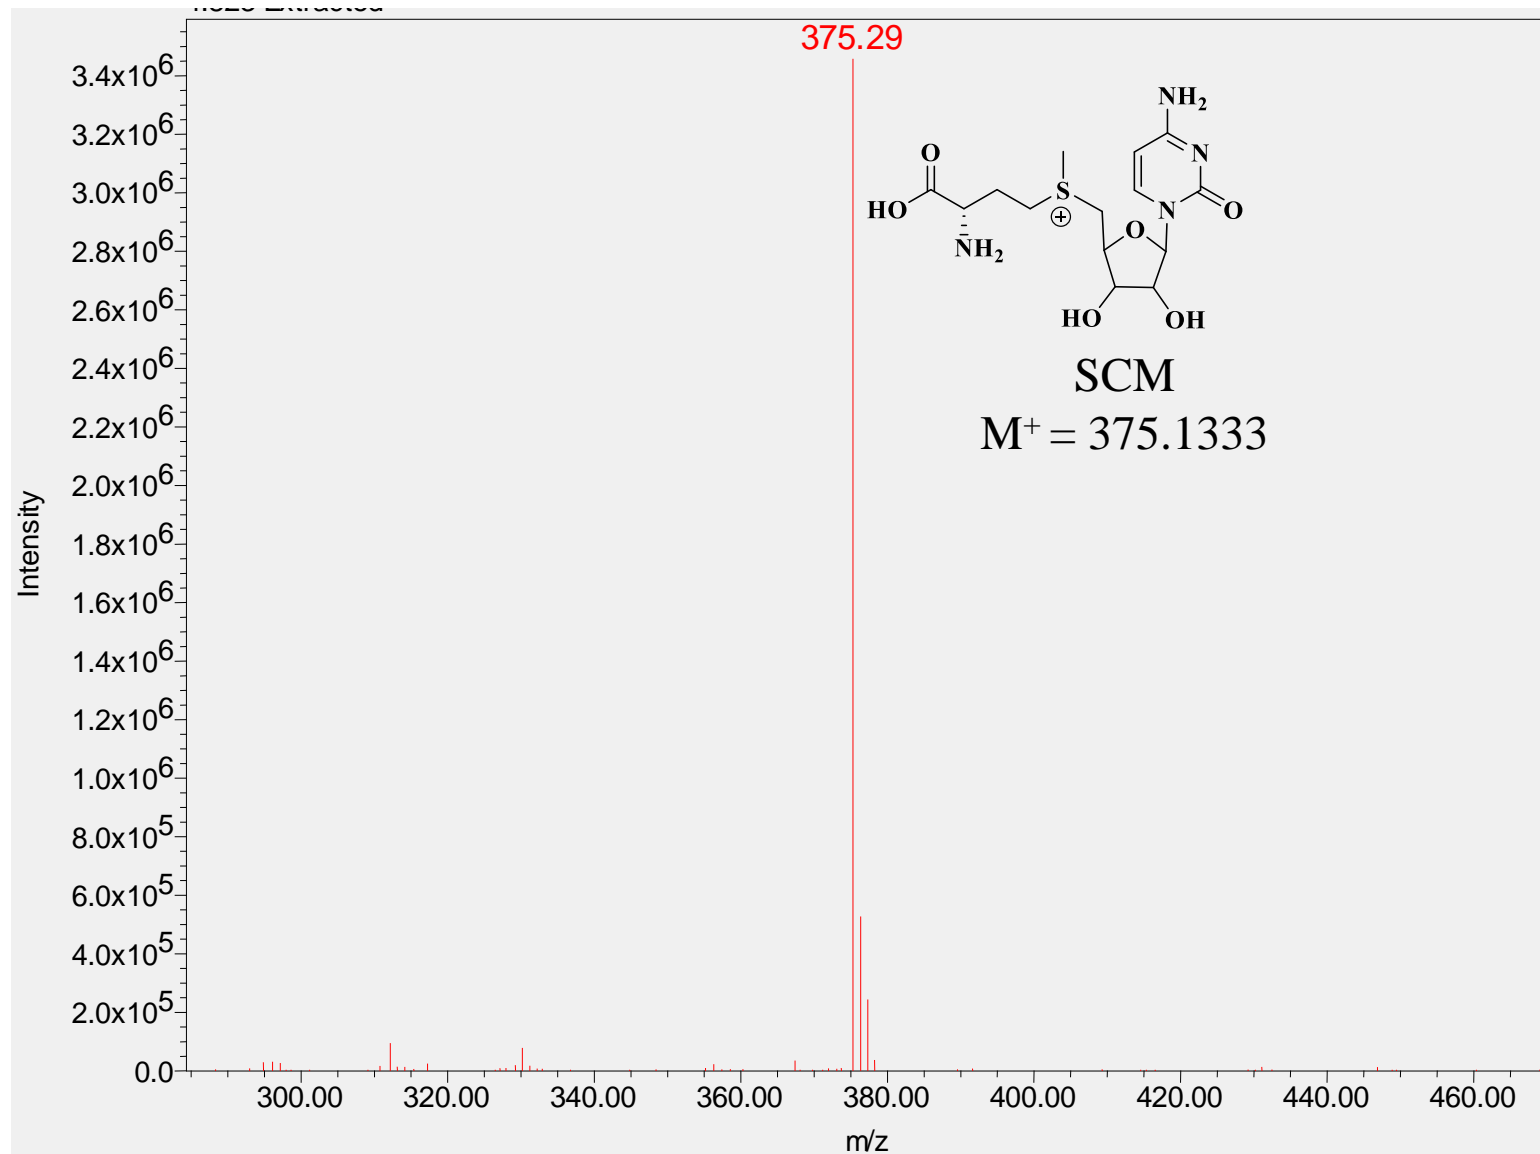

**Mass spectrum of SCM using Acquity UPLC H-Class System with Acquity QDa Detector.** Mass of SCM extracted at retention time 4.6 min, showing expected mass 375.29.

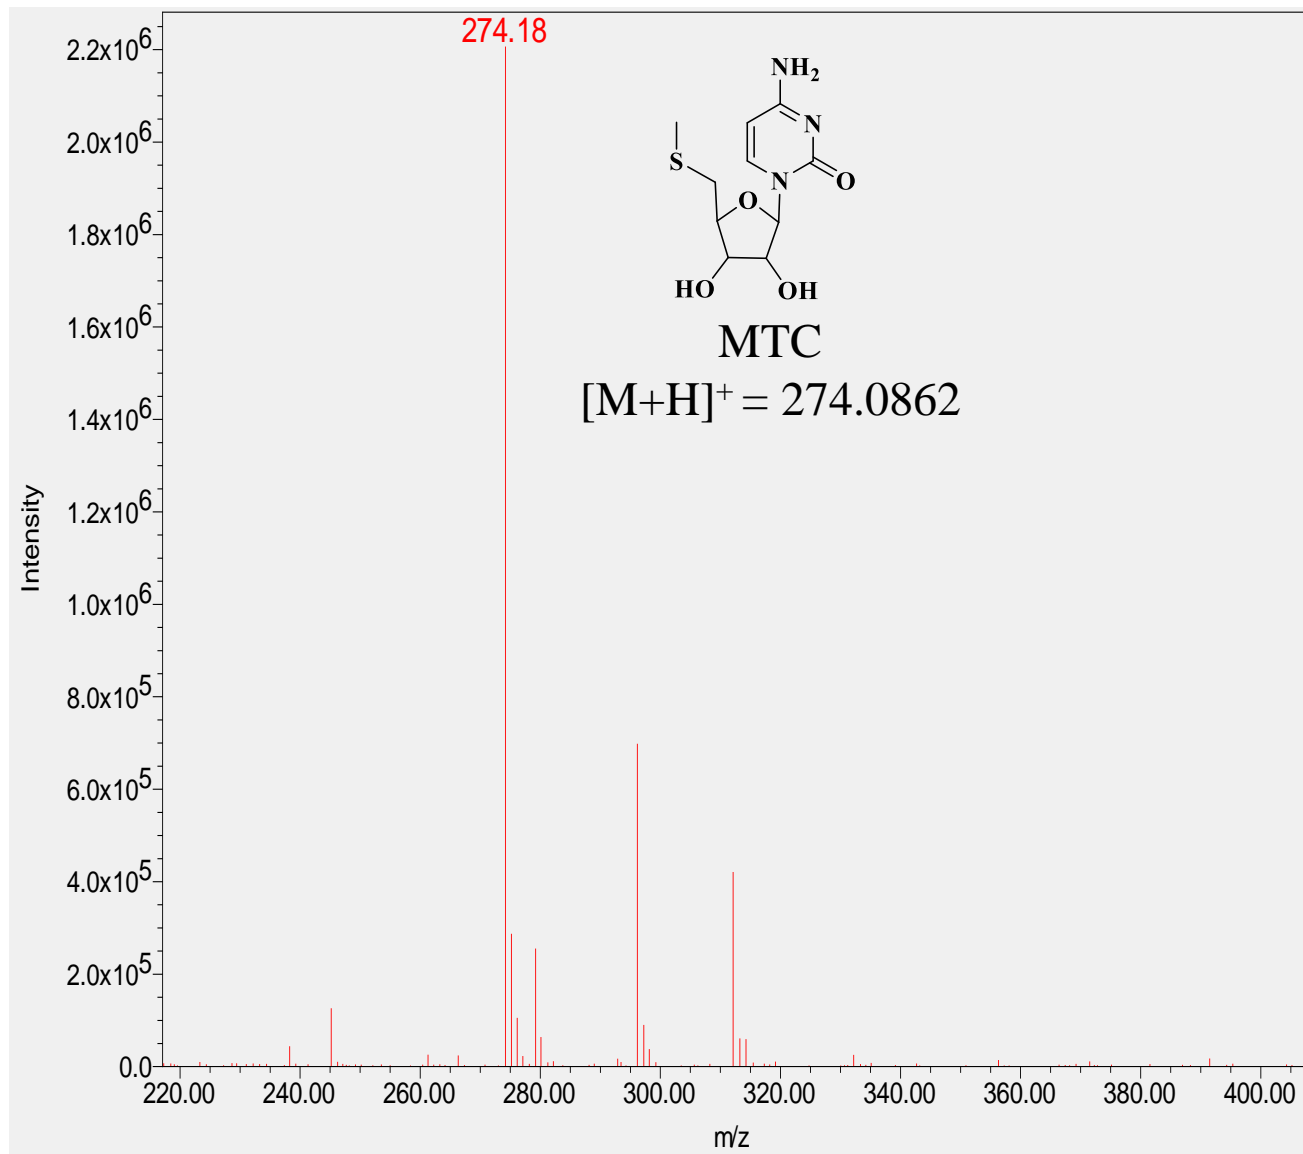

**Mass spectrum of MTC using Acquity UPLC H-Class System with Acquity QDa Detector.** Mass of MTC extracted at retention time 1.4 min, showing expected mass 274.18  $[M+H]^+$ .

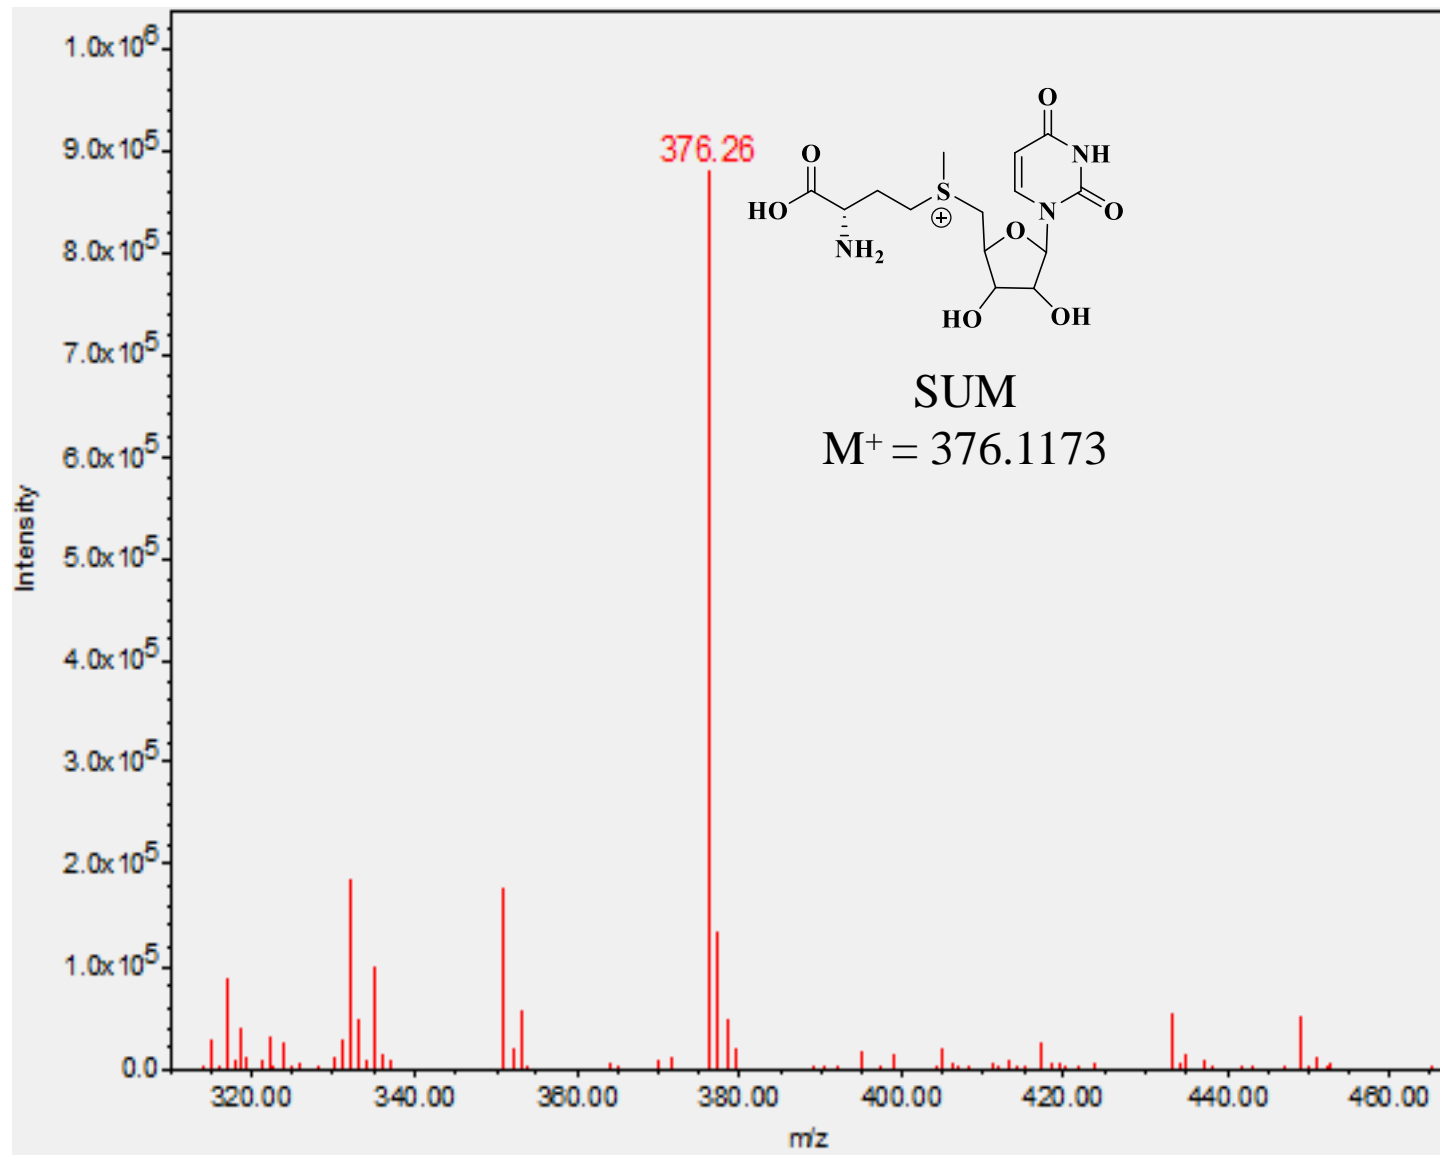

**Mass spectrum of SUM using Acquity UPLC H-Class System with Acquity QDa Detector.** Mass of SUM extracted at retention time 4.6 min, showing expected mass 376.26.

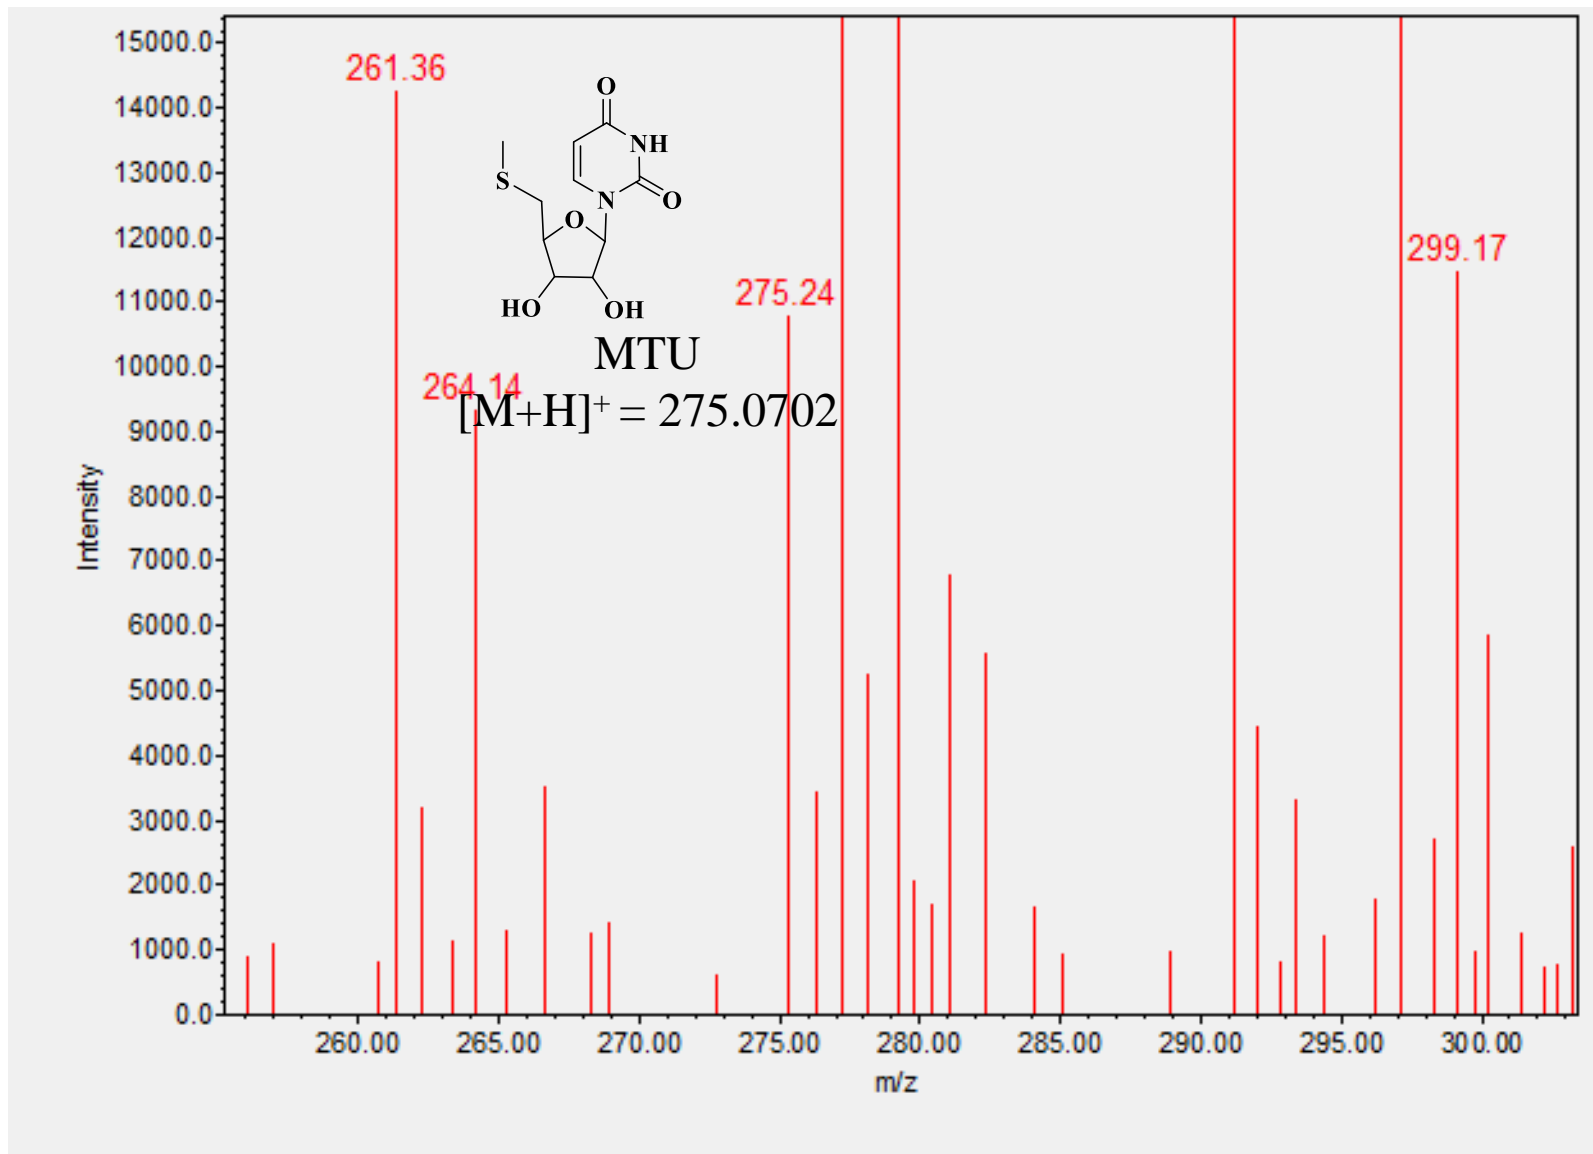

**ESI-MS mass spectrum of MTU.** Mass of MTU extracted at retention time 1.3 min, showing expected 275.24 mass.



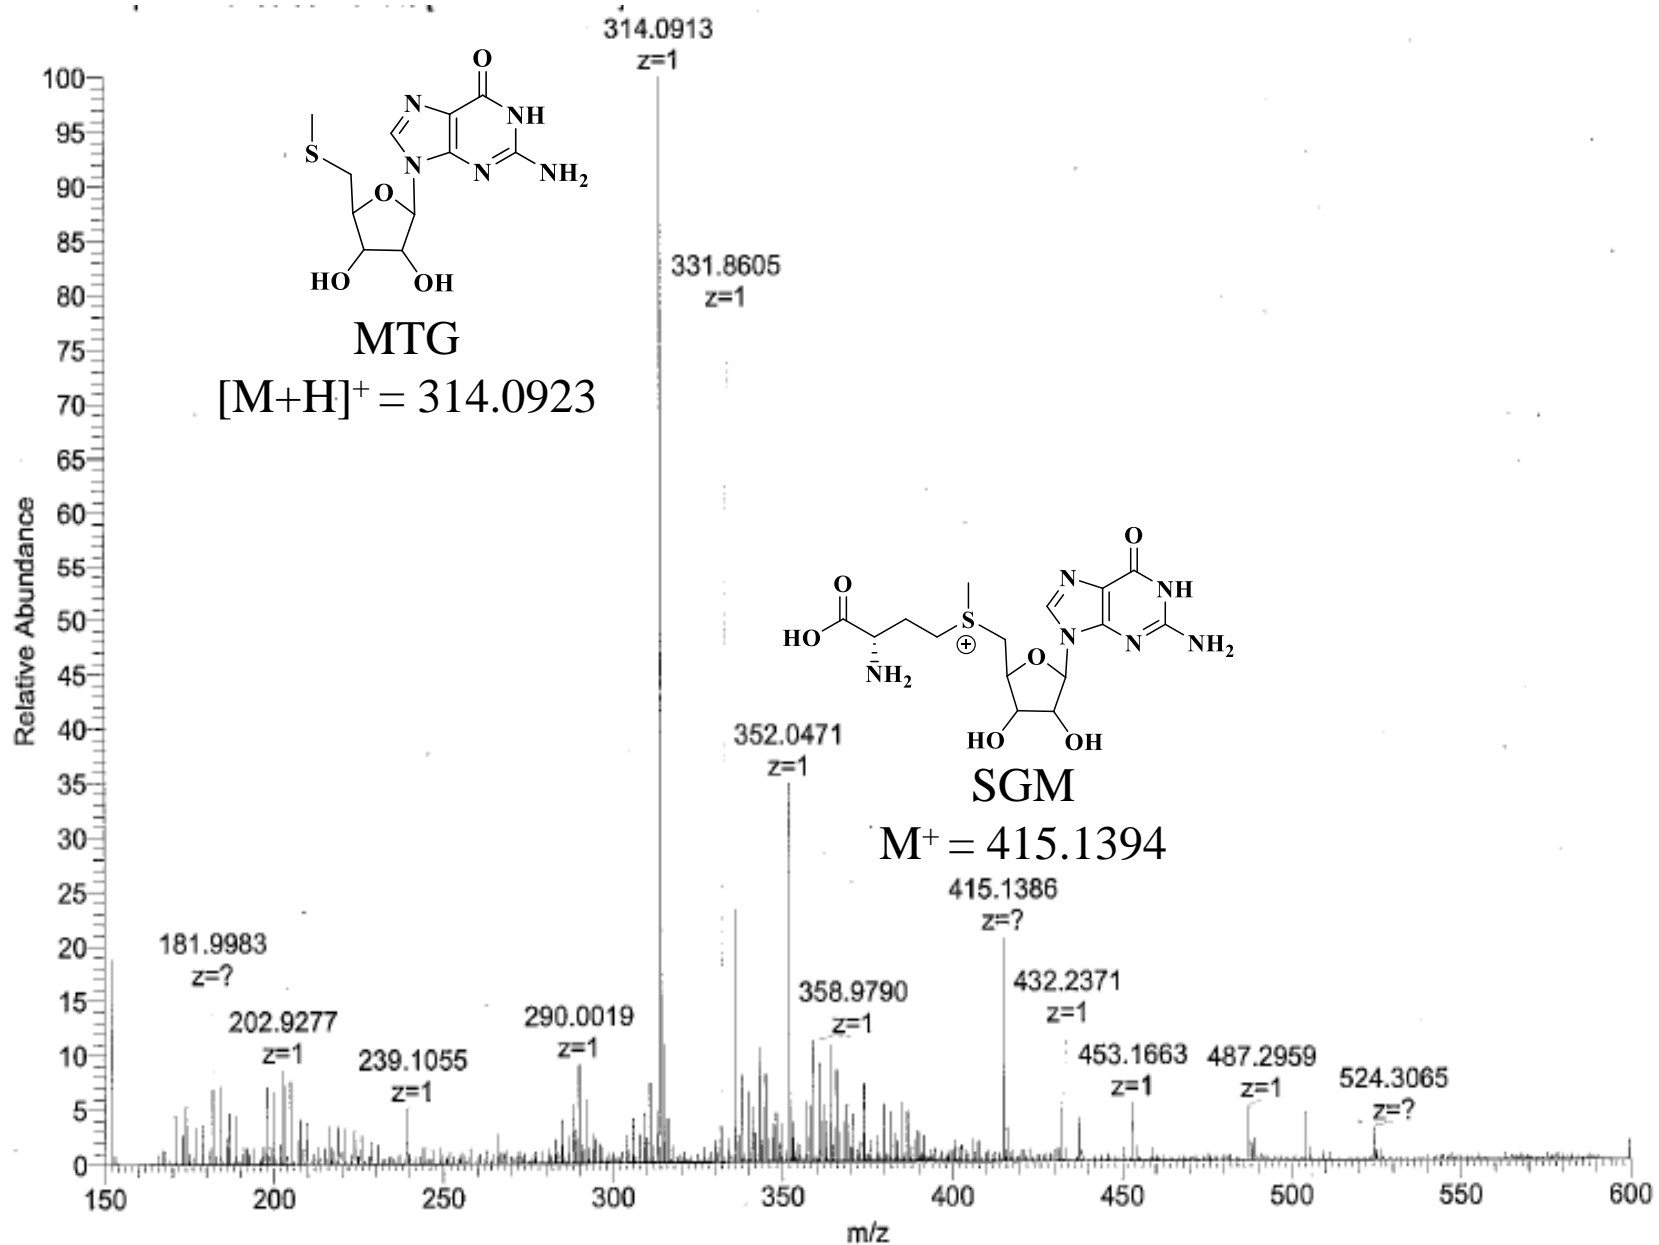

**ESI-MS spectrum of SGM after purification.** Purified SGM showing expected mass 415.1386 and degradation product MTG mass 314.0913  $[M+H]^+$ .

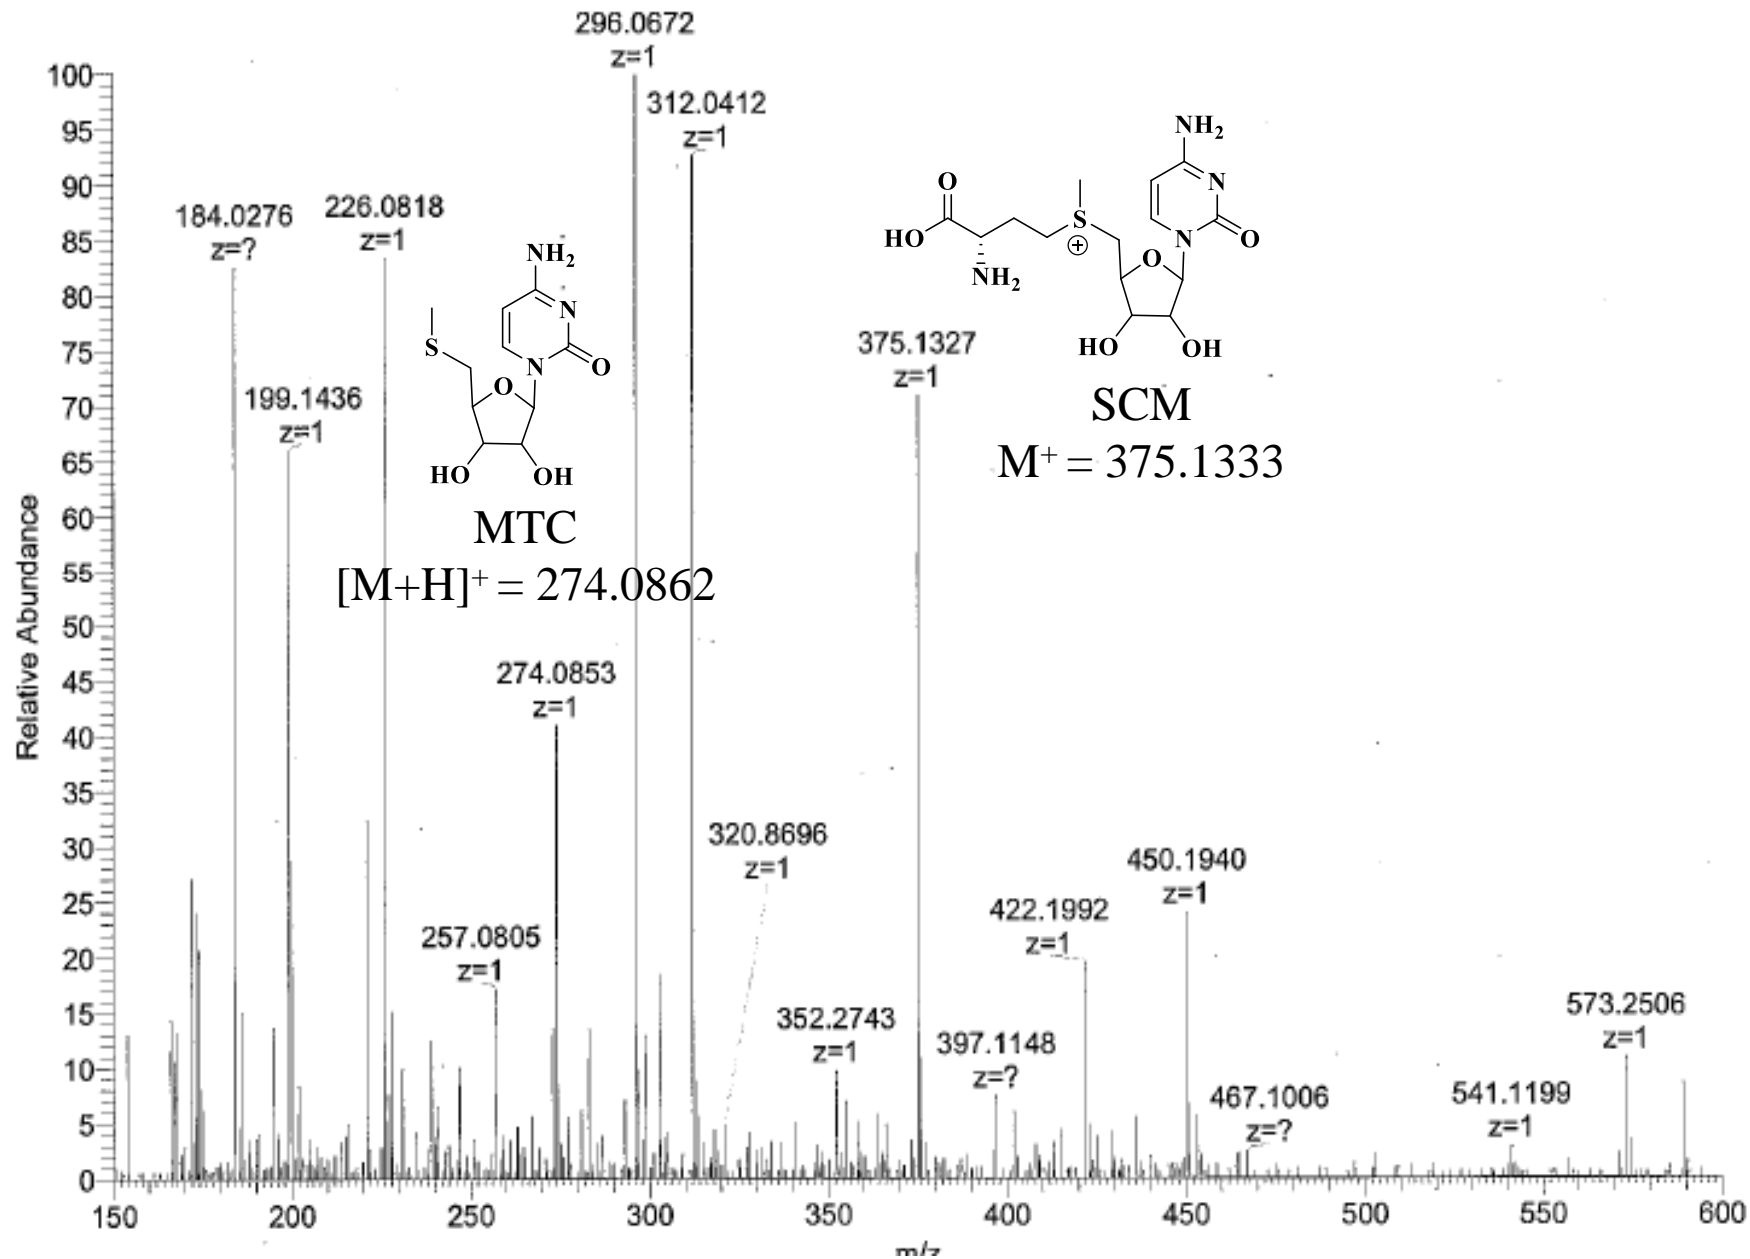

**ESI-MS spectrum of SCM after purification.** Purified SCM showing expected mass 375.1327 and degradation product MTC mass 274.0853  $[M+H]^+$ .

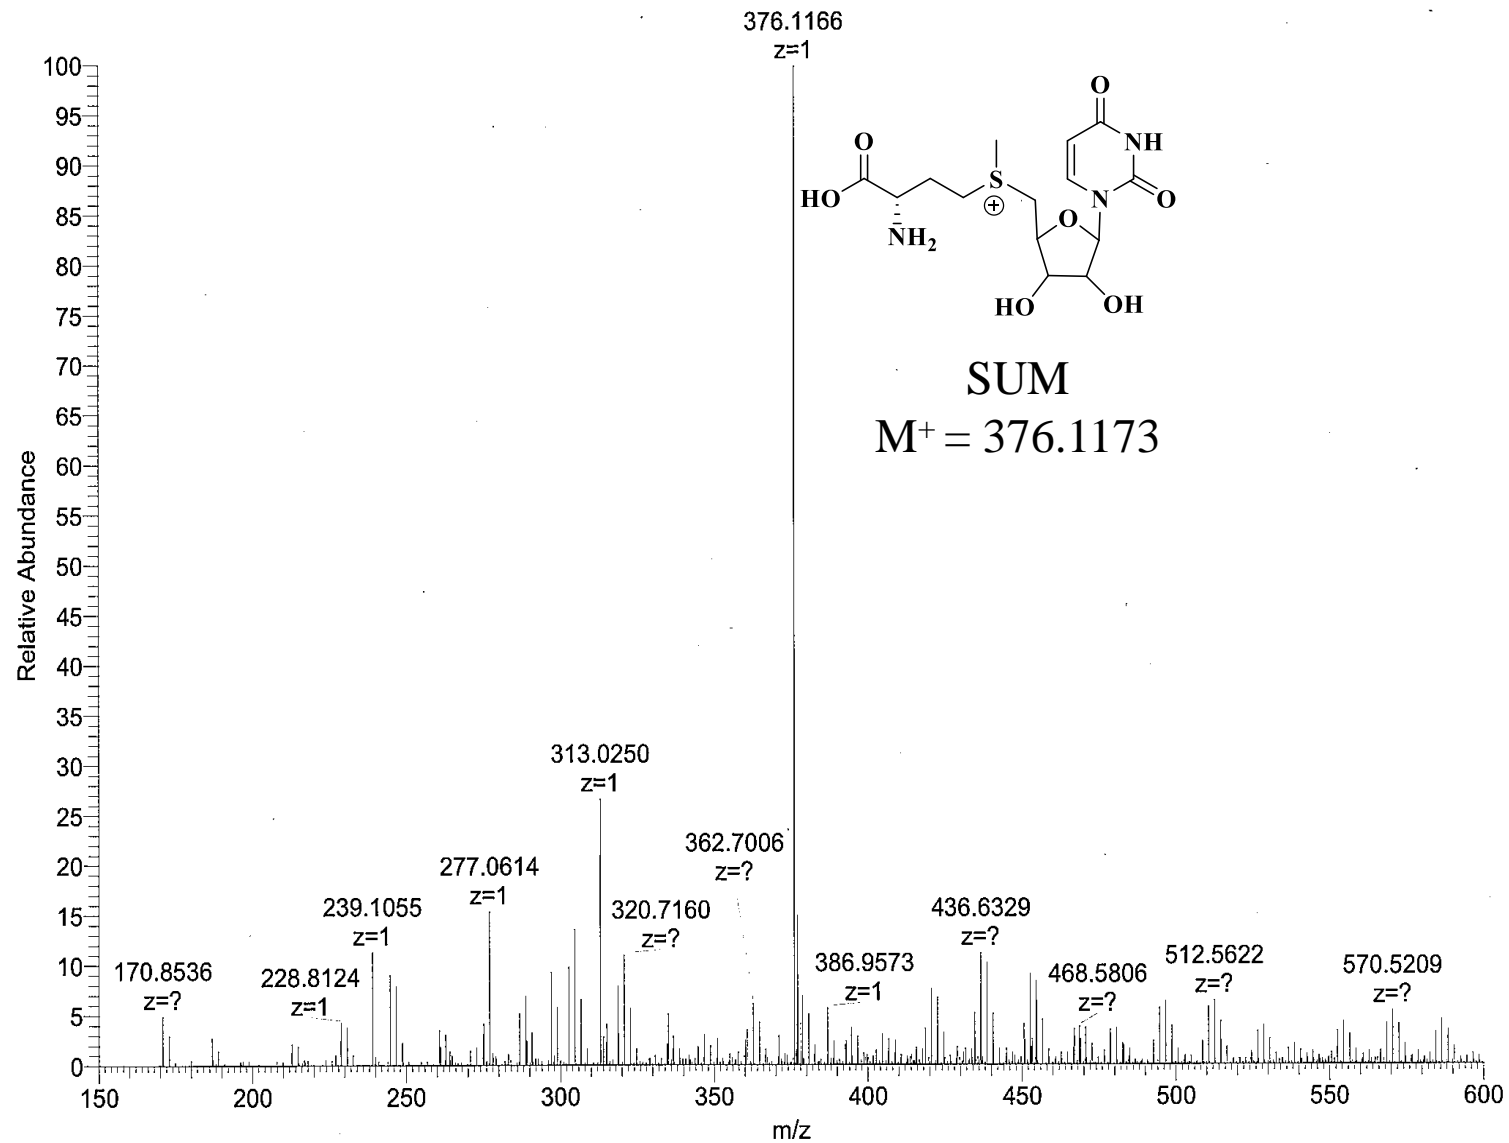

**ESI-MS spectrum of SUM after purification.** Purified SUM showing expected mass 376.1166.

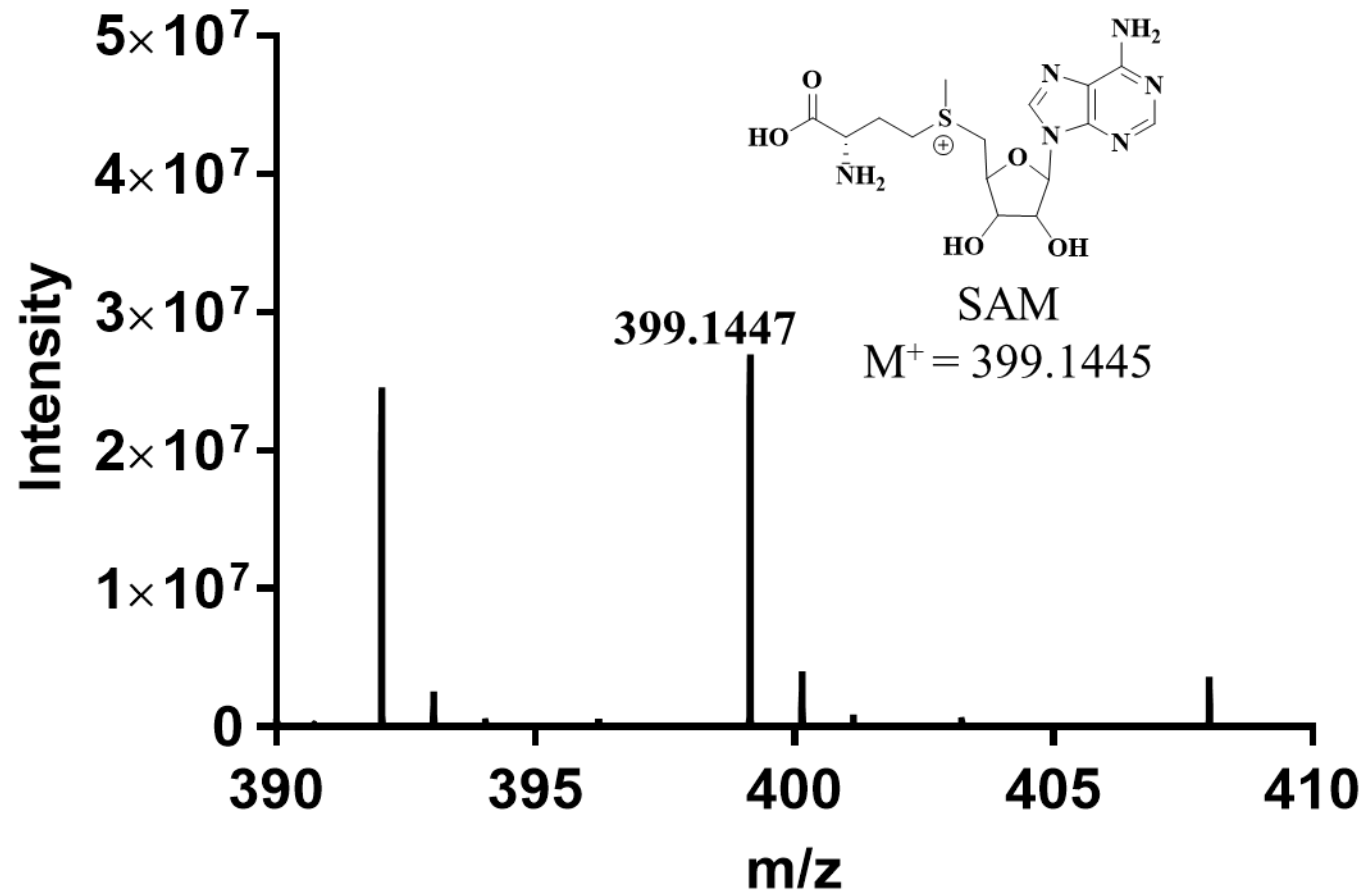

Mass spectrum of HepG2 extract showing the mass of SAM<sup>+</sup> 399.1445

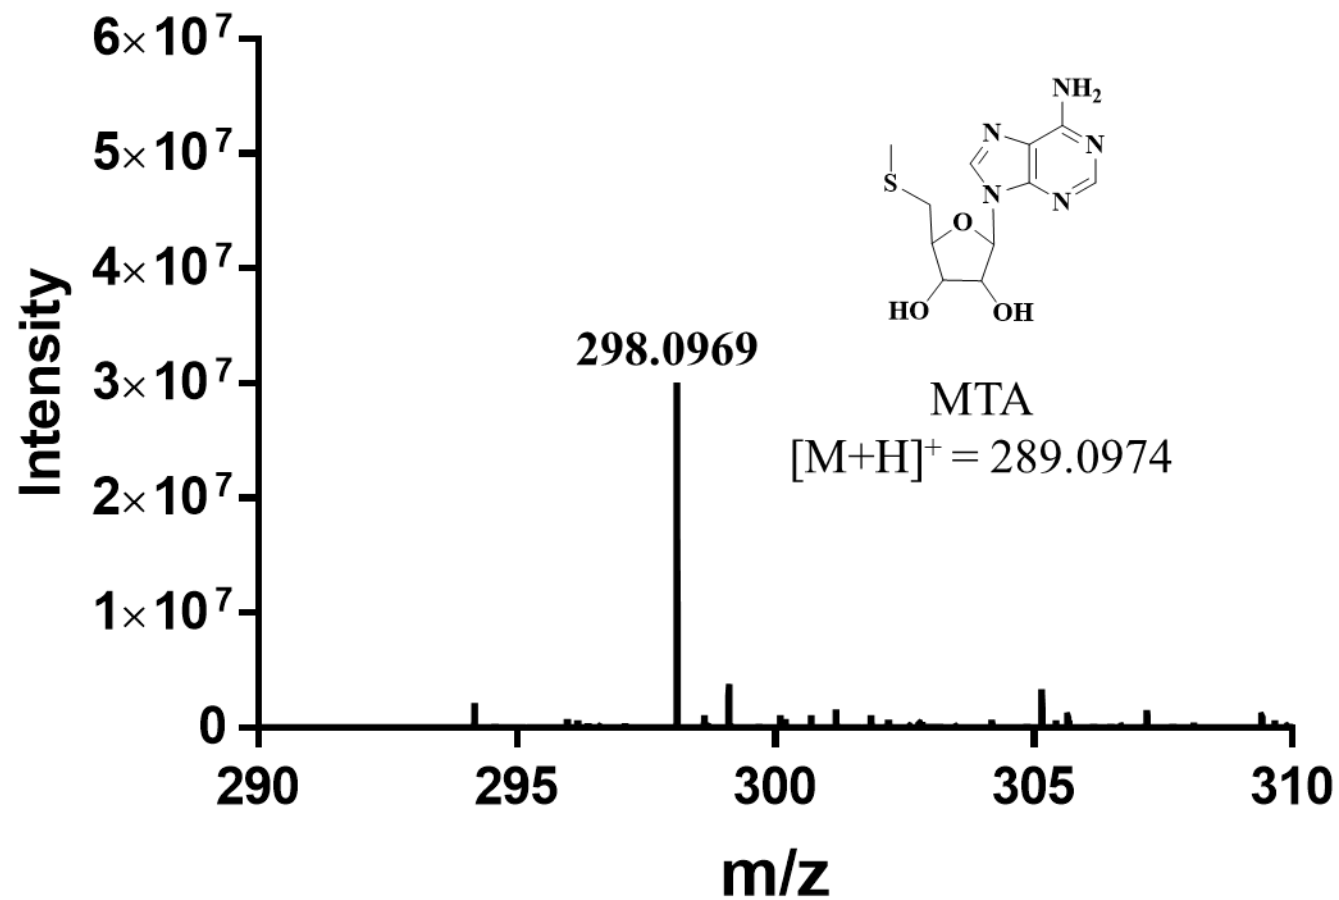

Mass spectrum of HepG2 extract showing the mass of MTA  $[M+H]^+ 298.0974$

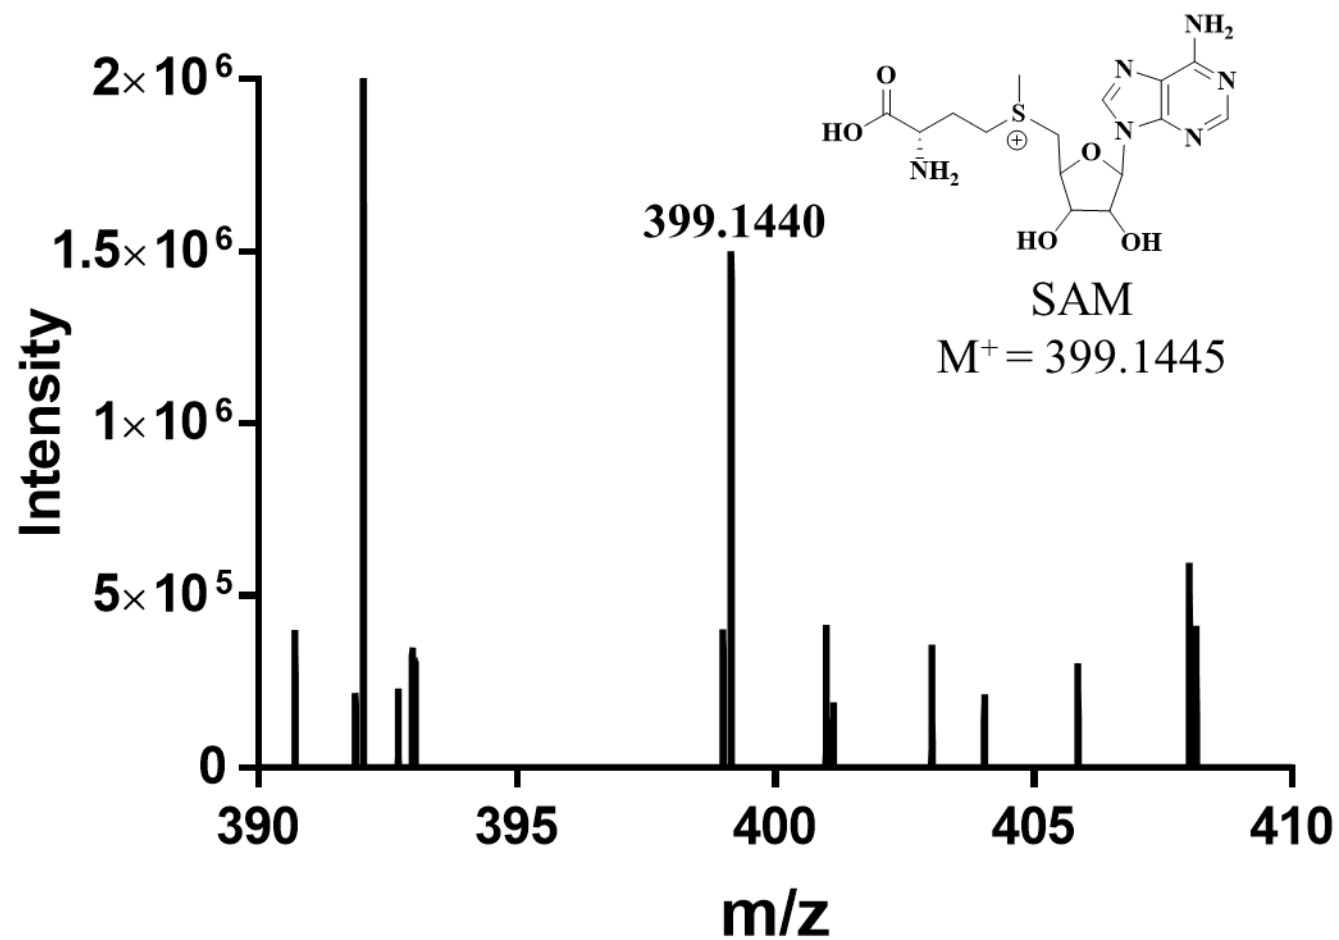

Mass spectrum of THLE-2 extract showing the mass of SAM<sup>+</sup> 399.1445

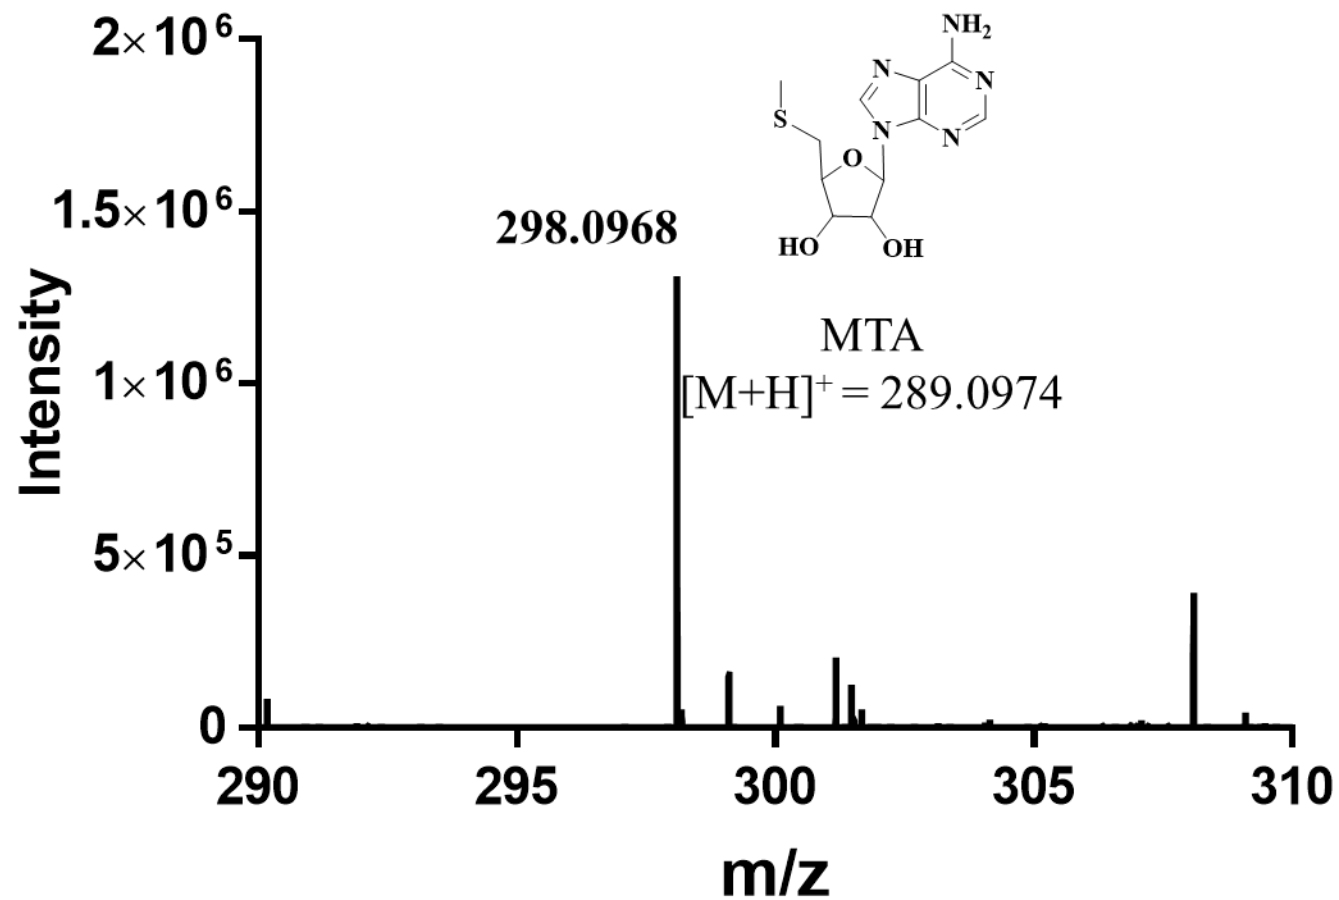

Mass spectrum of THLE-2 extract showing the mass of MTA  $[M+H]^+$  298.0974
