# Supplementary material for: Substrate Dynamics Contribute to Enzymatic Specificity in Human and Bacterial Methionine Adenosyltransferases
Source: PubMed Central journal article supplement — JACS Au. 2021 Nov 19;1(12):2349–60. doi: 10.1021/jacsau.1c00464 (PMC8715544; doi:10.1021/jacsau.1c00464), 2021-11-19
Supplement: au1c00464_si_002.pdf [file au1c00464_si_002.pdf]

# Supplementary Information

## Substrate dynamics contribute to enzymatic specificity in human and bacterial methionine adenosyltransferases

Madhuri Gade<sup>1</sup>, Li Lynn Tan<sup>2</sup>, Adam M. Damry<sup>2</sup>, Mahakaran Sandhu<sup>2</sup>, Joseph S. Brock<sup>3</sup>, Andie Delaney<sup>2</sup>, Alejandro Villar-Briones<sup>1</sup>, Colin J. Jackson<sup>\*2,4,5</sup>, Paola Laurino<sup>\*1</sup>

<sup>1</sup> Protein Engineering and Evolution Unit, Okinawa Institute of Science and Technology Graduate University, 1919-1 Tancha, Onna, Okinawa, Japan 904-0495

<sup>2</sup> Research School of Chemistry, Australian National University, Canberra, 2601, Australia

<sup>3</sup> Research School of Biology, Australian National University, Canberra, 2601, Australia

<sup>4</sup> Australian Research Council Centre of Excellence for Innovations in Peptide and Protein Science, Research School of Chemistry, Australian National University, Canberra, 2601, ACT, Australia

<sup>5</sup> Australian Research Council Centre of Excellence in Synthetic Biology, Research School of Chemistry, Australian National University, Canberra, 2601, ACT, Australia

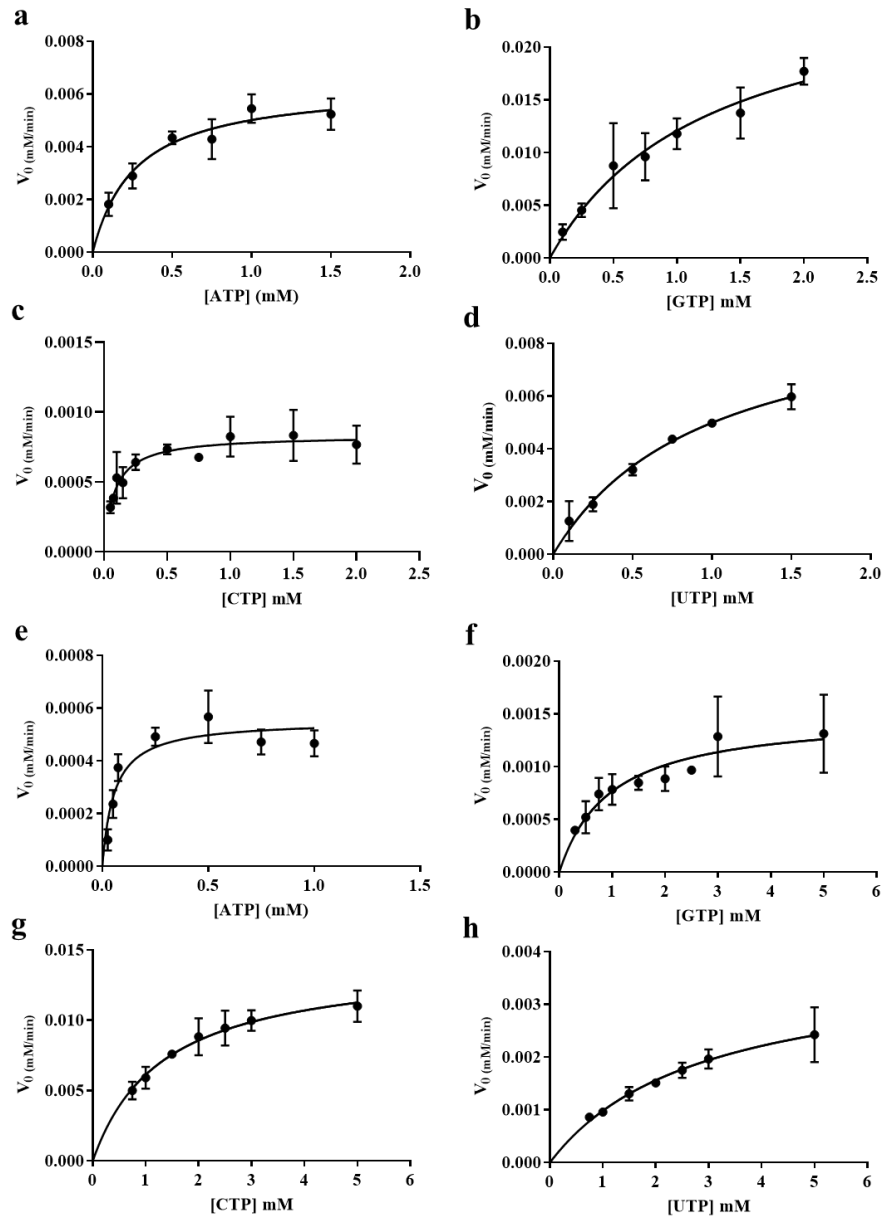

**Figure S1. Kinetic characterization of hMAT2A and eMAT using NTPs.** Michaelis-Menten plots for hMAT2A forming SAM (a), SGM (b), SCM (c) and SUM (d). Conditions: [hMAT2A] = 0.5  $\mu$ M; [NTPs] = 0.05 - 2 mM; [methionine] = 10 mM; [HEPES] = 100 mM (pH 8, 37  $^{\circ}$ C); [KCl] = 50 mM; [MgCl<sub>2</sub>] = 10 mM. Michaelis-Menten plots for eMAT forming SAM (e), SGM (f), SCM (g) and SUM (h). Conditions: [eMAT] = 0.5  $\mu$ M for ATP, 5  $\mu$ M for GTP, CTP and 10  $\mu$ M for UTP. [NTPs] = 0.025 - 5 mM. Other reaction conditions are same as hMAT2A. SNM production was analyzed by UPLC, and data fitted to the Michaelis-Menten equation using GraphPad Prism 7.02. Experiments were performed in duplicate and error bars show standard deviation.

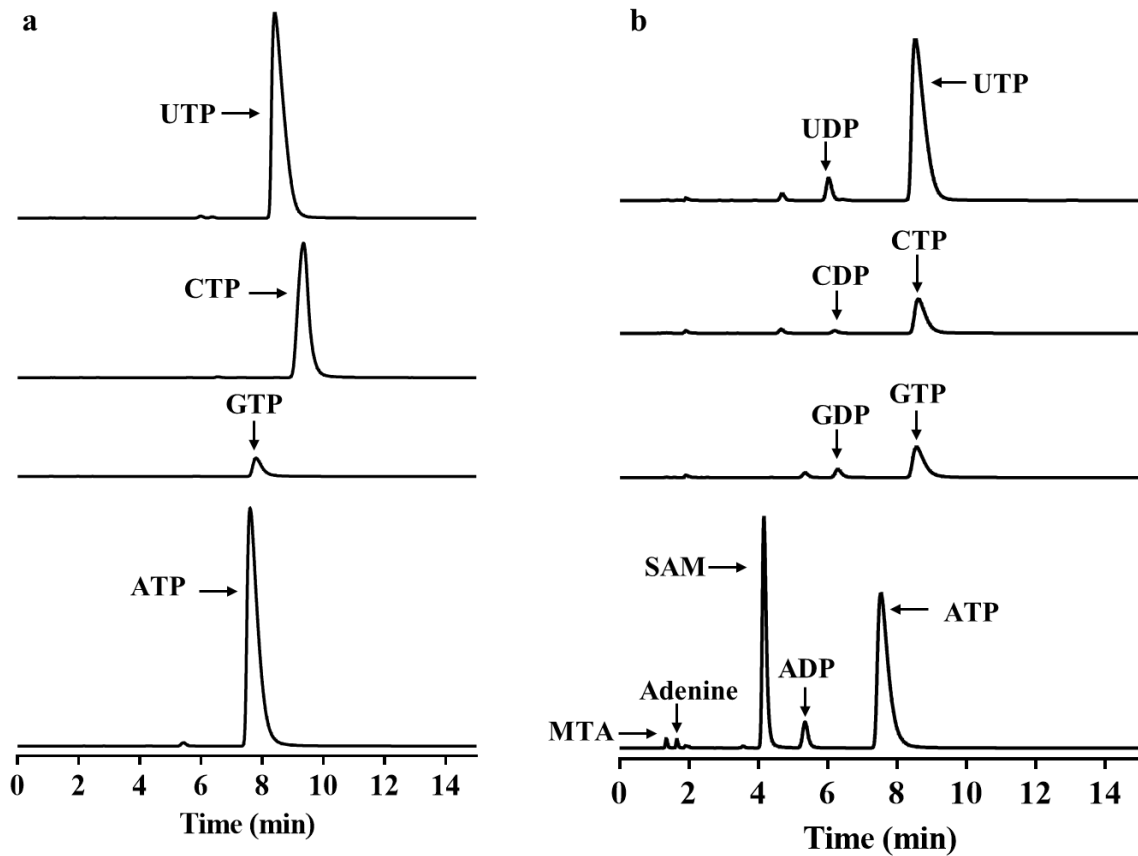

**Figure S2. UPLC chromatogram of the reaction between NTP, methionine, without MAT (a) and with eMAT (b). Reaction details and UPLC method as reported in methods.**

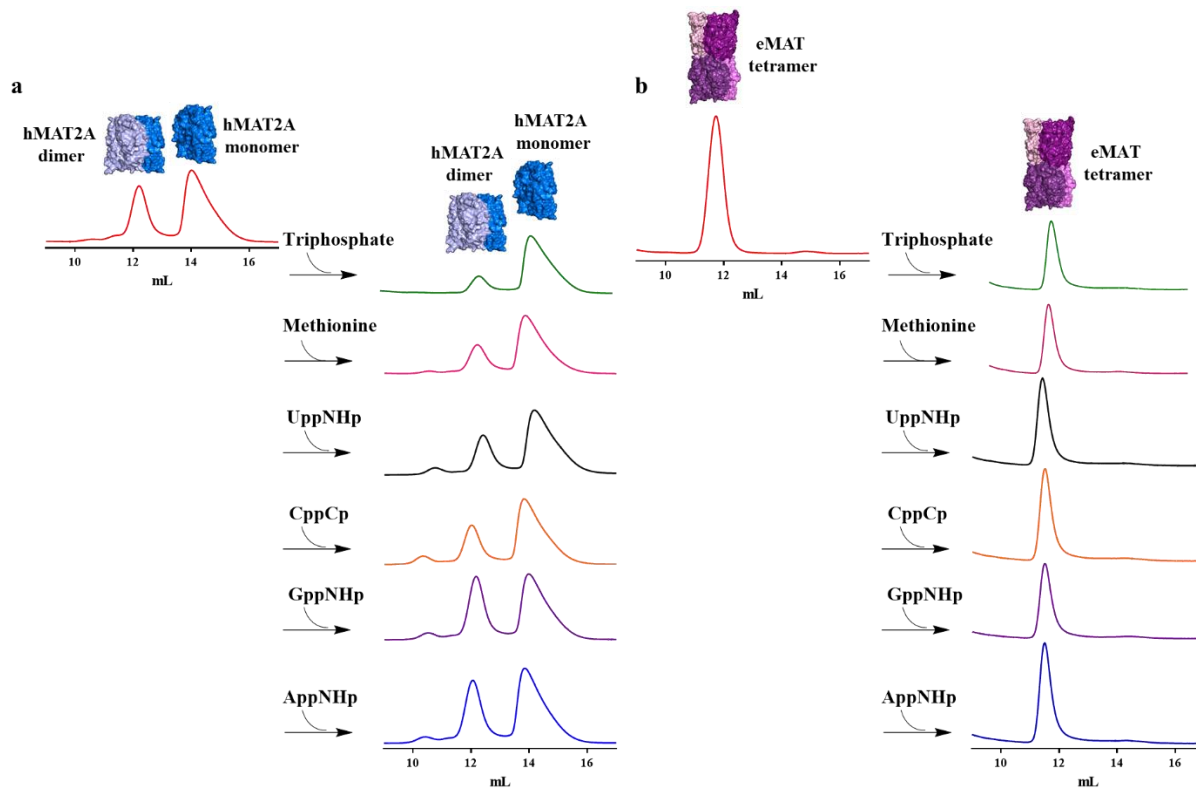

**Figure S3. Analysis of oligomeric state of hMAT2A and eMAT by size exclusion chromatography.** hMAT2A is in an equilibrium of a monomer and dimer (a) and eMAT is in a tetrameric state (b). When incubated with nonhydrolyzable NTPs, methionine (Met), triphosphate no change in oligomeric state was observed.

**a**

|        |     |                              |                              |                    |     |
|--------|-----|------------------------------|------------------------------|--------------------|-----|
| eMAT   | 1   | -----MAKHLFTSEVSEGH          | PDKIADQISDAVLDAI             | LEQDFK             | 37  |
| hMAT2A | 1   | MNGQLNGFHEAFIEEGTFLFTSEVSEGH | PDKICDQISDAVLDAHL            | QQDE               | 51  |
| eMAT   | 38  | ARVACETYVKTGMVLVGGEITTS      | AWVDIEEITRNTVREIGYVHSDMGFDAN | 88                 |     |
| hMAT2A | 52  | AKVACETVAKTGMILLAGEITSR      | AAVDYQKVREAVKHHIGYDDSSKGF    | DYK                | 102 |
| eMAT   | 89  | SCAVLSAIGKQSPDINQGV          | --DRADPLEQAGDQGLMFGYATNE     | TDVLMFA            | 137 |
| hMAT2A | 103 | TCNVLVALEQQSPDIAQGVHLDR      | NEE-DICAGDQGLMFGYATDETE      | ECMPL              | 152 |
| eMAT   | 138 | PIITYAHRIVQRQAEVVRKNGTLPWLR  | PDASQVTFQY--DDGKI--VGIDAV    | 184                |     |
| hMAT2A | 153 | TIIVLAHKLNAKLAELRRNGTLPWLR   | PDSTQVTVQYMQDRGAVLP          | IRVHTI             | 203 |
| eMAT   | 138 | PIITYAHRIVQRQAEVVRKNGTLPWLR  | PDASQVTFQY--DDGKI--VGIDAV    | 184                |     |
| hMAT2A | 153 | TIIVLAHKLNAKLAELRRNGTLPWLR   | PDSTQVTVQYMQDRGAVLP          | IRVHTI             | 203 |
| eMAT   | 185 | VLSTIQHSEEDQKSLQEA           | VMEEIKPILPAEWLTSATKFFINPT    | GRFVIGG            | 235 |
| hMAT2A | 204 | VISVQHDEEVCLDEM              | RDLKEKVIKAVVPAKYLDEDTIYHLQPS | GRFVIGG            | 254 |
| eMAT   | 236 | PMGDCCLTGRKII                | IVDTYGGMARHGGGAFSGKDP        | SKVDRSAAYAARYVAKNI | 286 |
| hMAT2A | 255 | PQGDAGLTGRKII                | IVDTYGGWGAHGGGAFSGKDY        | TKVDRSAAYAARVWAKSL | 305 |
| eMAT   | 287 | VAAGLADRCEIQVSYAIGVAE        | FTSIMVETFGTEKVPSEQITLLVREF   | FDLR               | 337 |
| hMAT2A | 306 | VKGLCRVLVQVSYAIGVSHPL        | SISIFHYGTSQKSERELLEIVKKN     | FDLR               | 356 |
| eMAT   | 338 | PYGLIQMLDLLHP                | IYKETAAYGHFGRHF              | PWEKTDKAQLLRDAAGLK | 384 |
| hMAT2A | 357 | PGVIVRDLDLKKPIY              | QRTAAYGHFGRDSFPWEVPK         | LKY-----           | 395 |

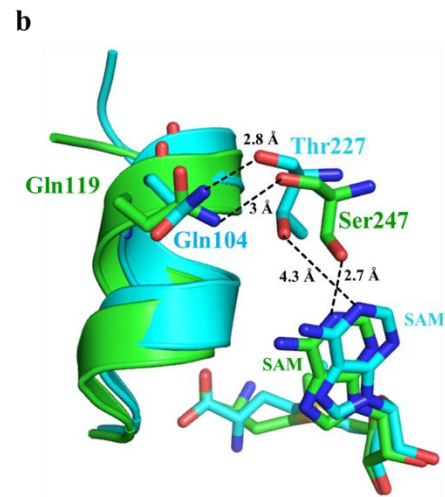

**Figure S4. Multiple sequence alignment of eMAT and hMAT2A; Interaction of gating loop residue Gln with Ser and Thr.** a) Identical amino acid residues are shown in shades of blue. Residues interacting with adenine of SAM are marked in red rectangle. Residues involved in catalysis<sup>5</sup> are marked in pink rectangle. b) SAM, interacting residue and gating loop is in green color for hMAT2A (PDB ID 4NDN). SAM, interacting residue and gating loop is in cyan color for eMAT (PDB ID 1RG9). N1 of adenine is forming hydrogen bond with Thr227 of eMAT (bonding distance 4.3 Å). N1 of adenine is forming hydrogen bond with Ser247 of hMAT2A (bonding distance 2.7 Å). Backbone of Thr227 and Ser247 is forming hydrogen bond with Gln104 (bonding distance 2.8 Å) and with Gln119 (bonding distance 3 Å) respectively.

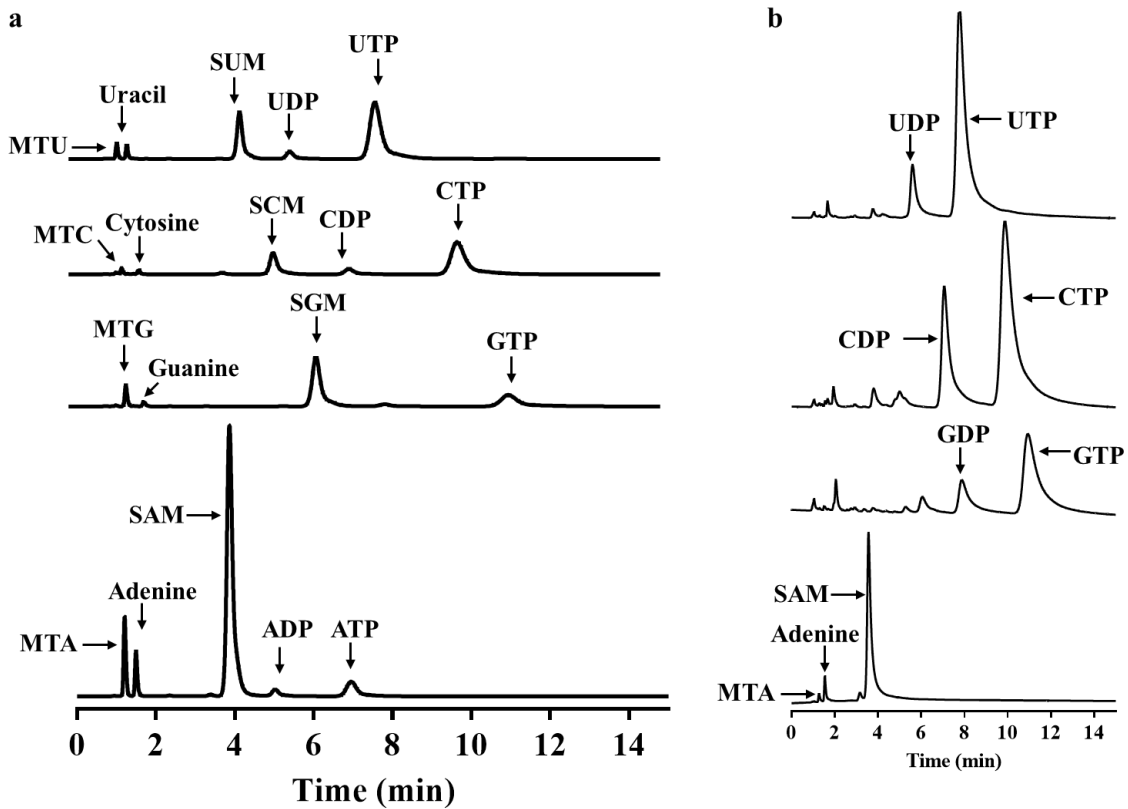

**Figure S5. UPLC chromatogram of the reaction between NTP, methionine, and Ser247Thr hMAT2A mutant (a), Thr227Ser eMAT mutant (b).** Reaction details and UPLC method as reported in methods.

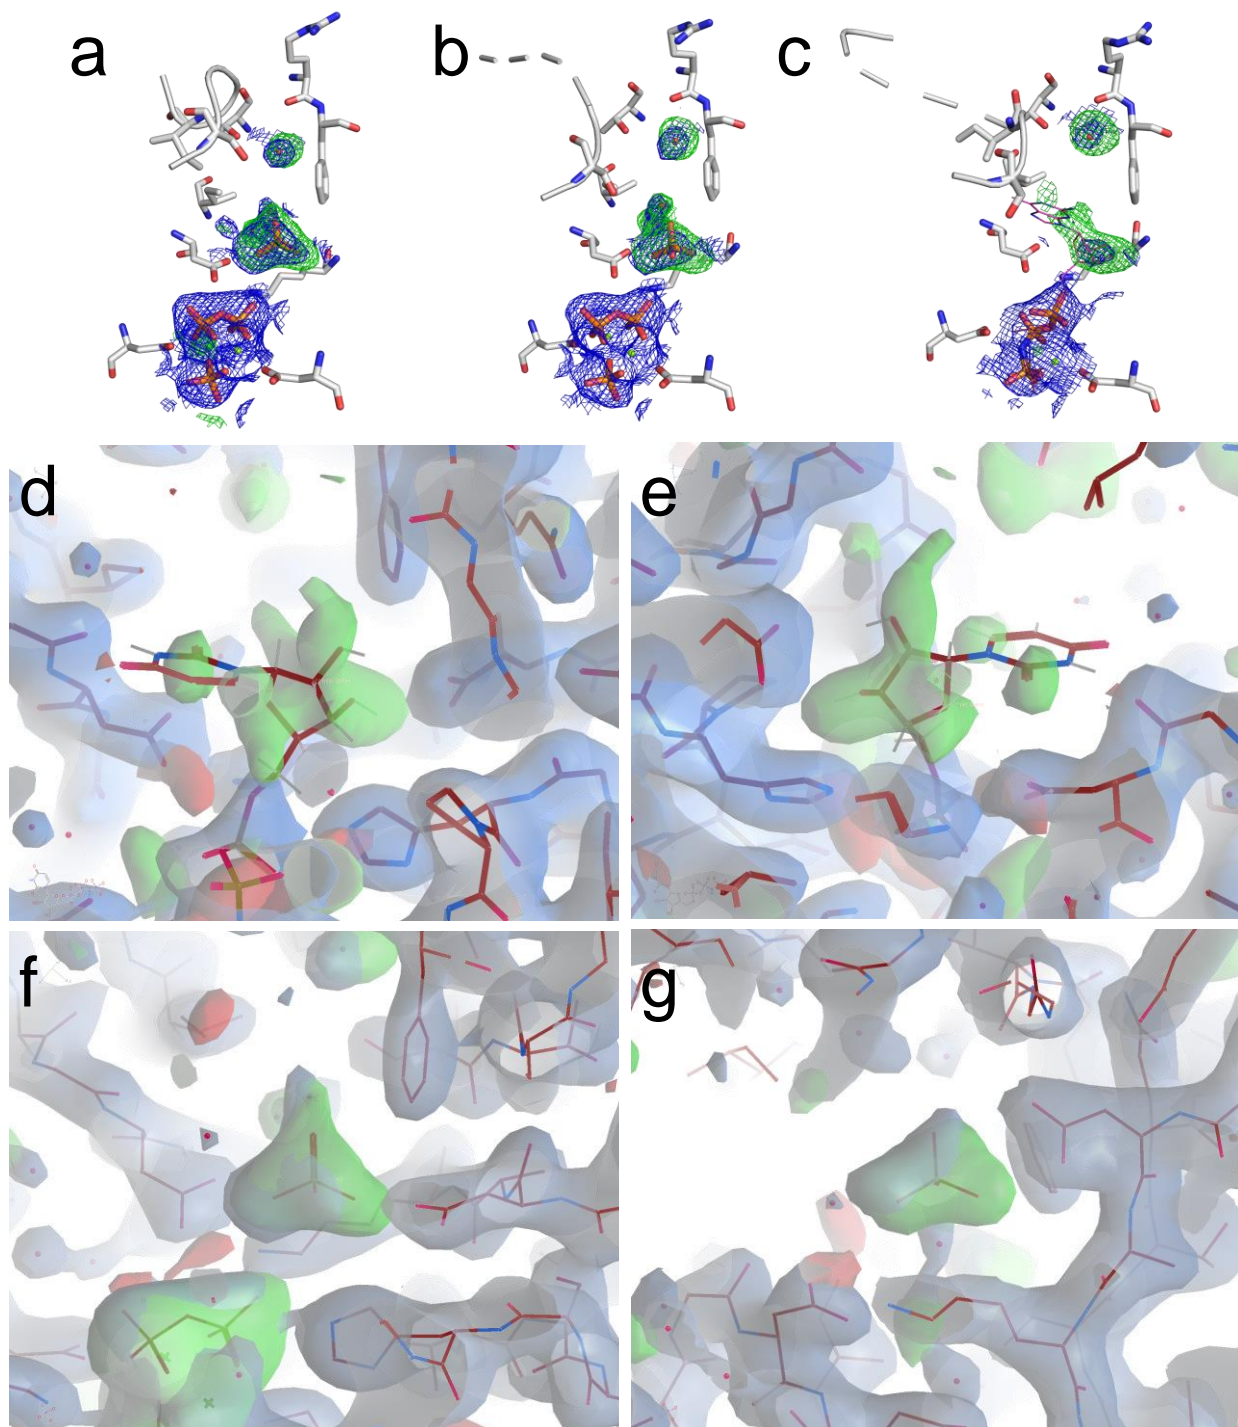

**Figure S6. Models and electron density for various substrate/product complexes with eMAT.** Omit electron density ( $mF_o-DF_c$ ) is shown in green mesh (3.0 s),  $2mF_o-DF_c$  density is shown as blue mesh (1.5 s). (a) eMAT co-crystallized with UTP (2.25 Å); the pyrophosphate and phosphate groups are included in the model and shown with  $2mF_o-DF_c$ , omit density. (b) eMAT co-crystallized with GTP (2.39 Å); the pyrophosphate and phosphate groups are included in the model and shown with  $2mF_o-DF_c$ , omit density. (c) eMAT co-crystallized with GppNHp (2.5 Å); the PPNP group is included in the model and shown with  $2mF_o-DF_c$ , ambiguous omit density potentially corresponding to disordered substrate/product is shown. A poorly fitting model of

GppNHp is shown in line representation (magenta). (d & e) Enlarged view of electron density in binding site of UppNHp from two angles showing the density is continuous with the electron density of the PPNP group. (f & g) Omit electron density corresponding to the bound Pi molecule in the eMAT:UTP complex. The density is tetrahedral, and the Pi group is in hydrogen bonding distance to two water molecules and Asp163. This is not unusual as Asp/Glu residues often have elevated pKa values in enzyme active sites.

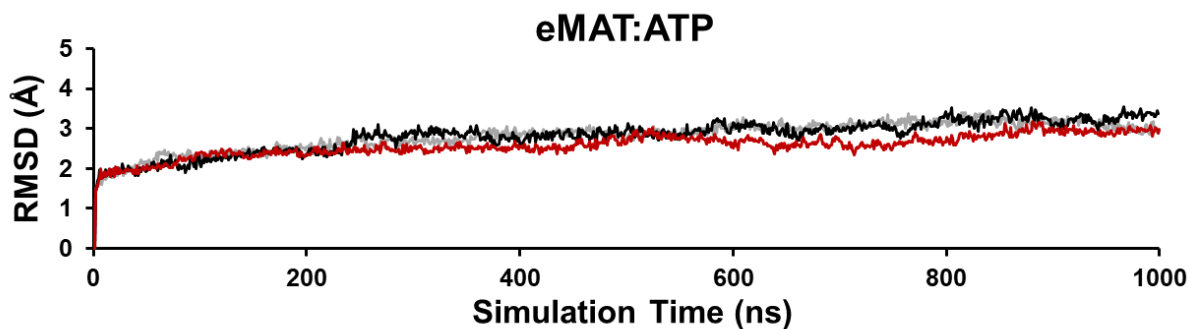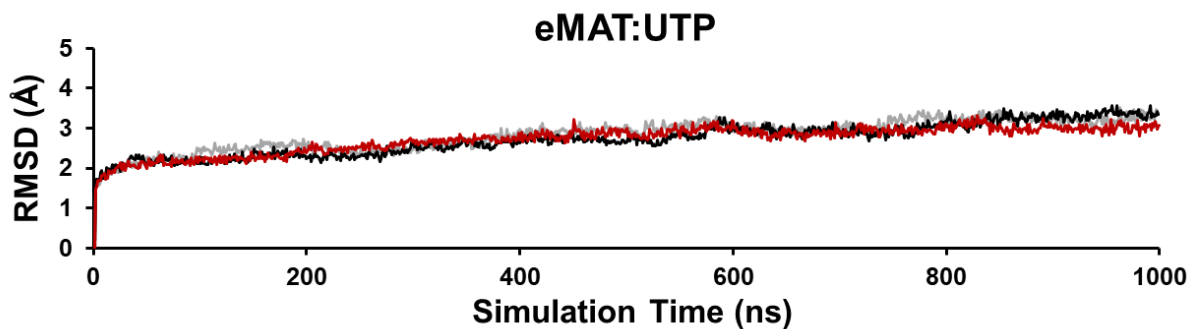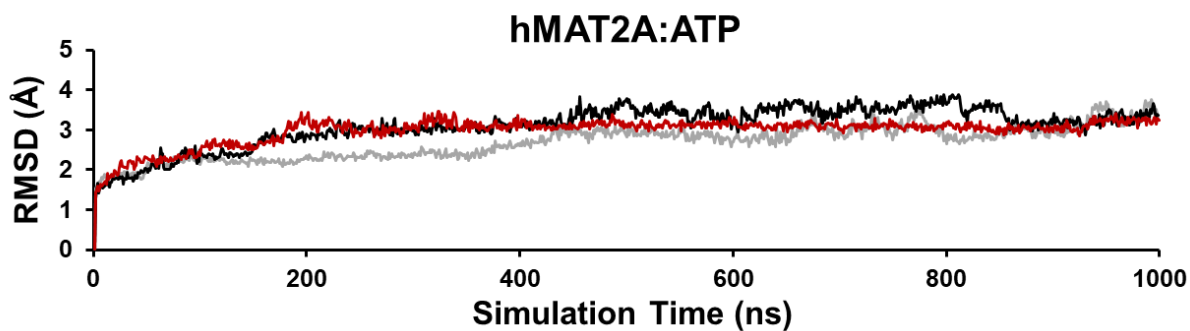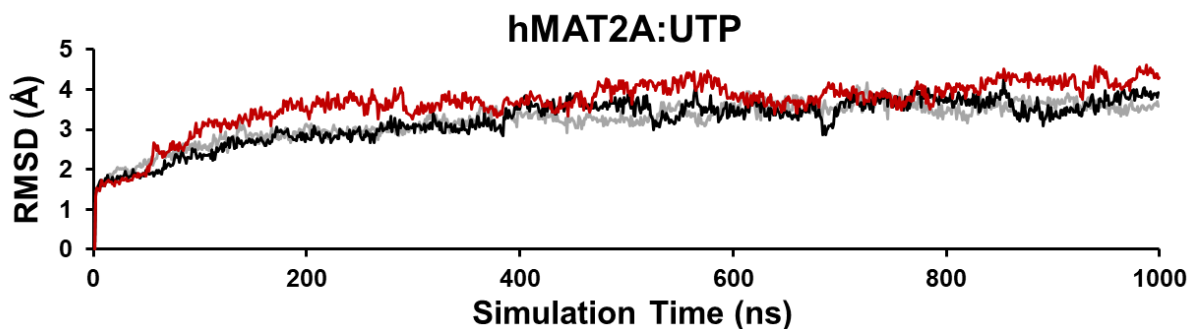



**Figure S7. Closed state MD simulation RMSD.** A plot of simulation RMSD versus time for shows a rapid divergence from the closed state input structure followed by slow equilibration that gradually reaches an RMSD plateau, indicative of the slow active site loop opening observed. Line colors indicate simulation replicates for each system modeled and the red line represents the trajectory used as input for open state simulations (Figure S8).

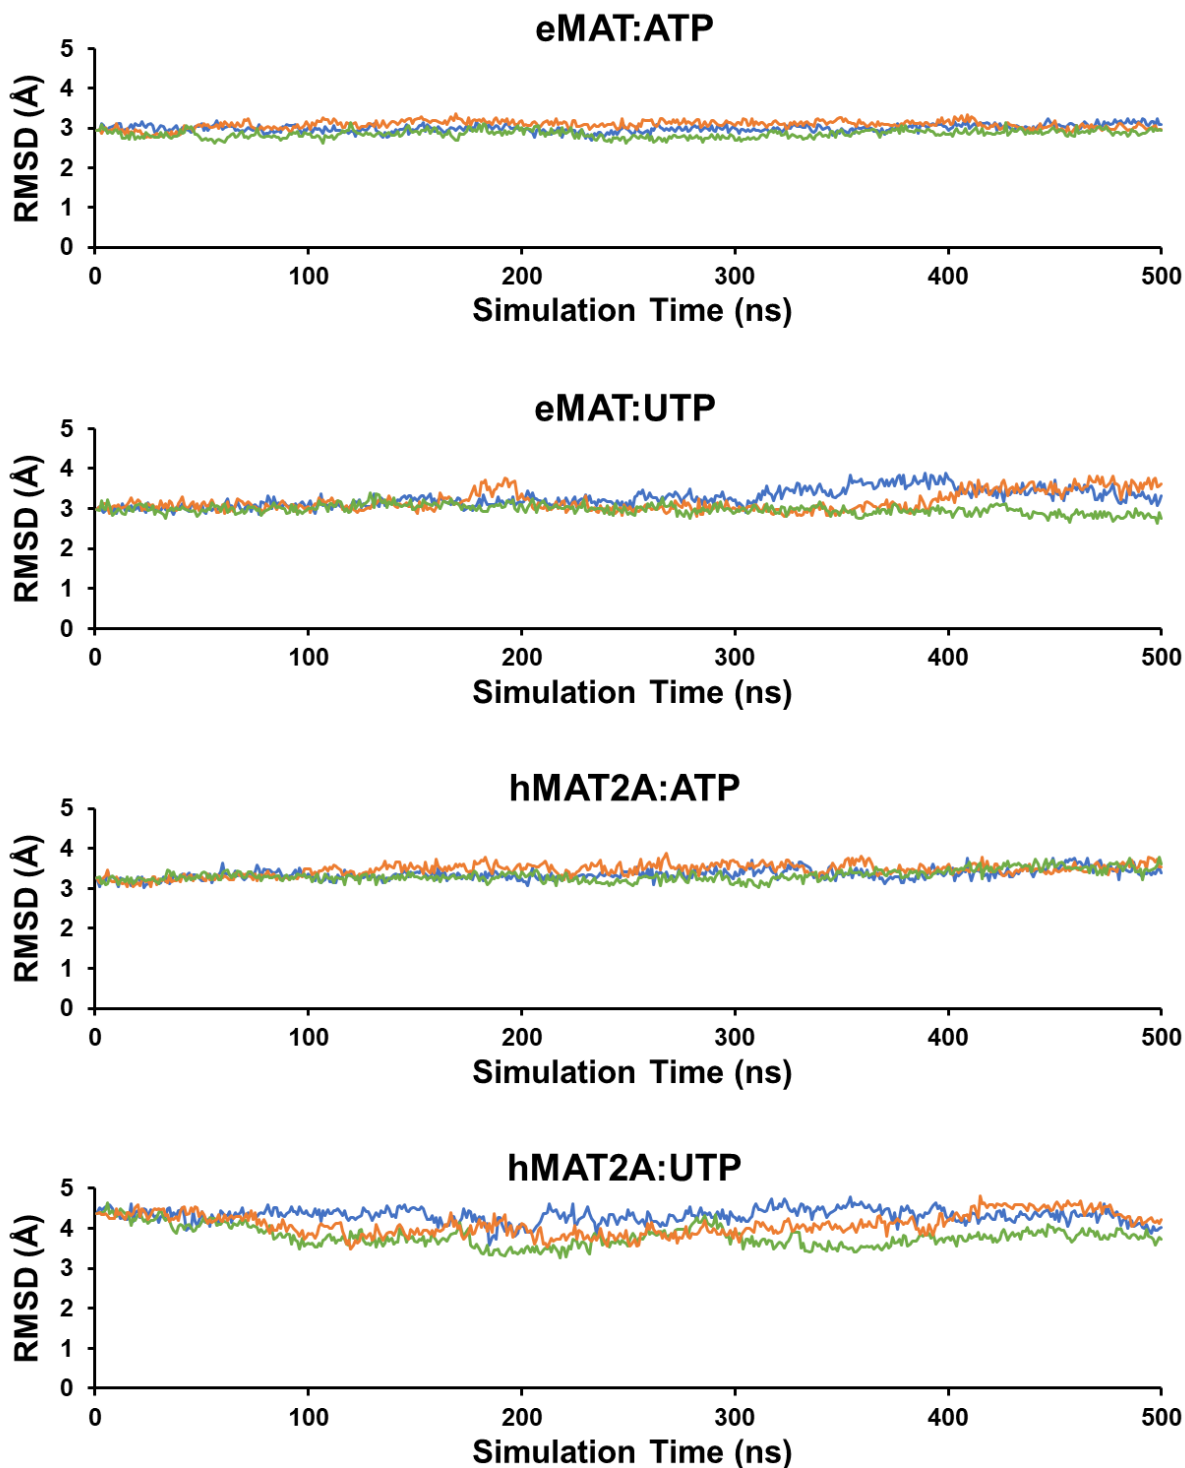

**Figure S8. Open state MD simulation RMSD.** A plot of simulation RMSD versus time indicates that open state input structures are already equilibrated by the end of the closed state simulations and remain at a relatively constant RMSD over 500 ns of additional simulation time. The RMSD shown is relative to the closed state input structure. Line colors indicate simulation replicates for each system modeled.

## eMAT

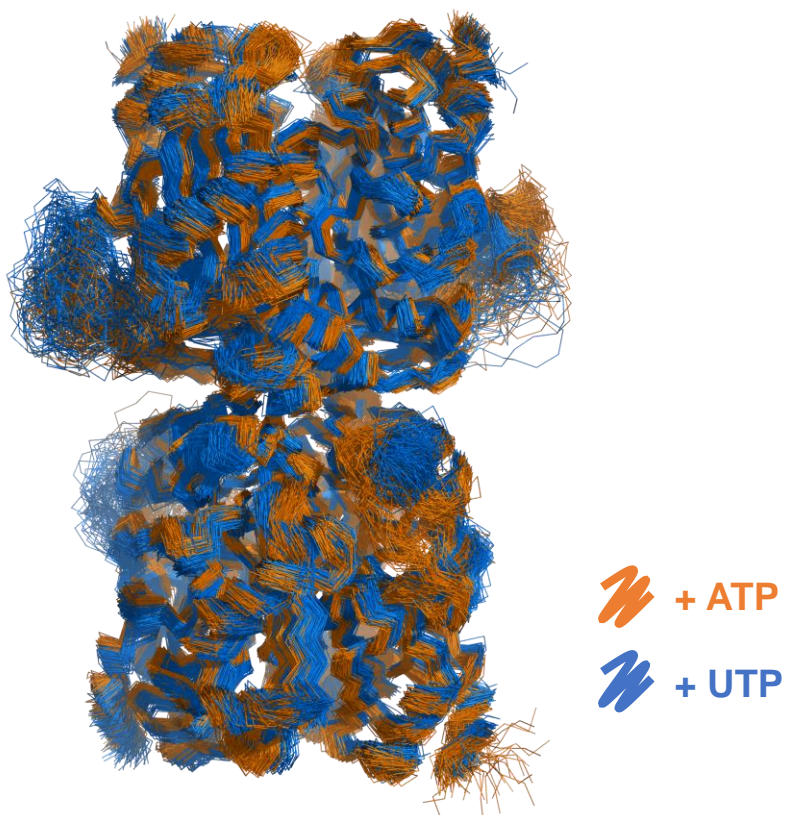

## hMAT2A

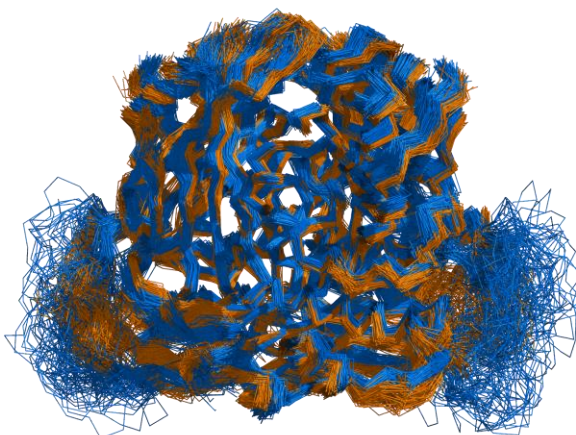

**Figure S9. MD backbone ensembles of the eMAT and hMAT2A open states bound to ATP or UTP.** Representative backbone ensembles are shown in a ribbon representation, each consisting of 150 structures sampled evenly over triplicate 500 ns open state simulations. Binding of ATP vs UTP causes no obvious change in conformational sampling throughout either protein backbone except for the active site loop. A broadened conformational sampling of the active site loop in the presence of UTP is observed in both eMAT and hMAT2A.

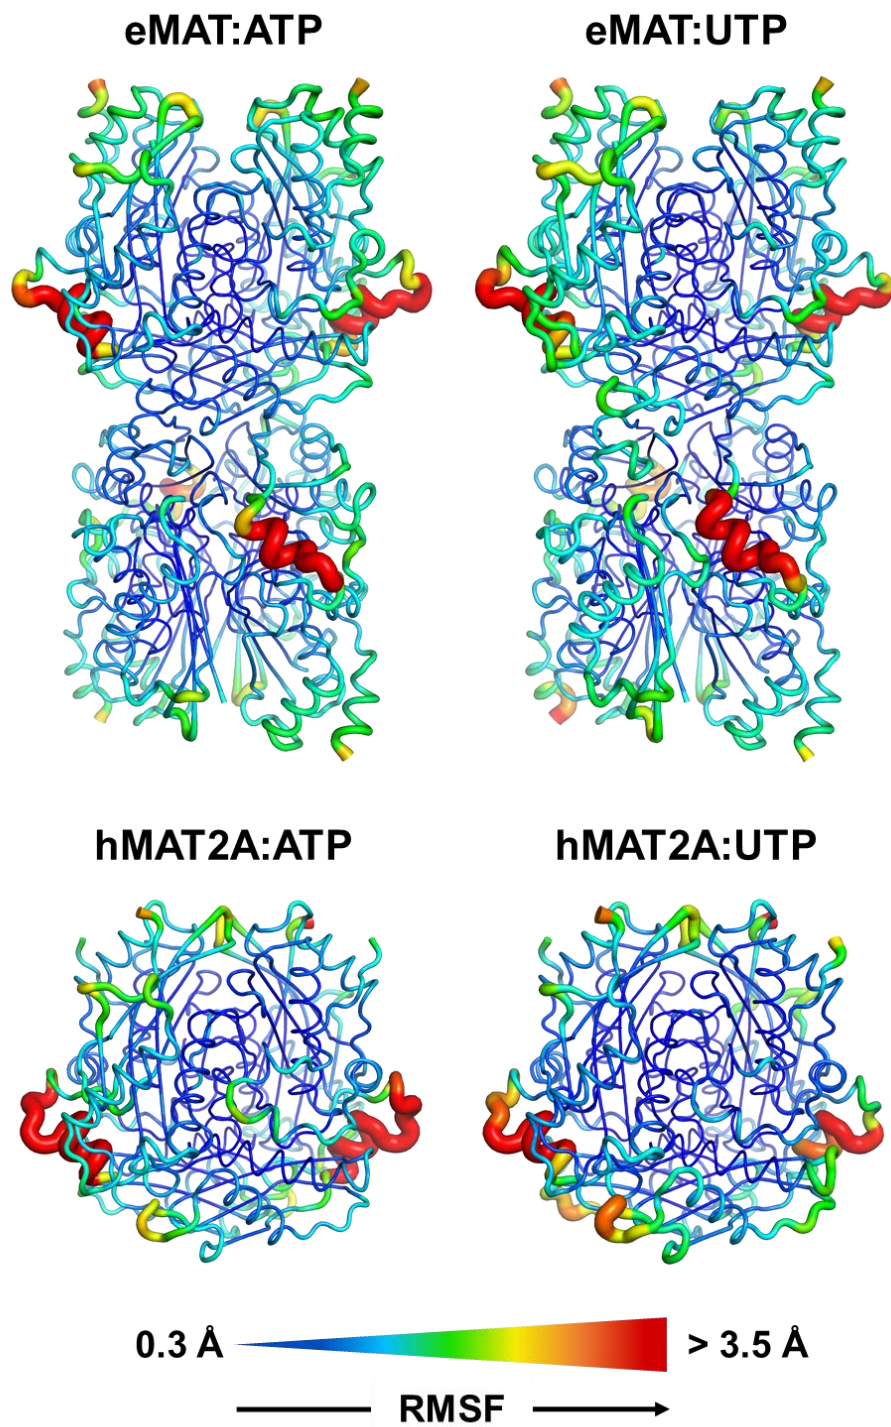

**Figure S10. C $\alpha$  RMSF over open state MD simulation trajectories.** Mapping C $\alpha$  RMSF values to eMAT and hMAT2A simulation input structures (closed state) highlights the high flexibility observed in the active site loop open state. The RMSF values used were obtained as the average of triplicate trajectories. No obvious differences in eMAT and hMAT2A backbone dynamics were observed over the course of these trajectories.

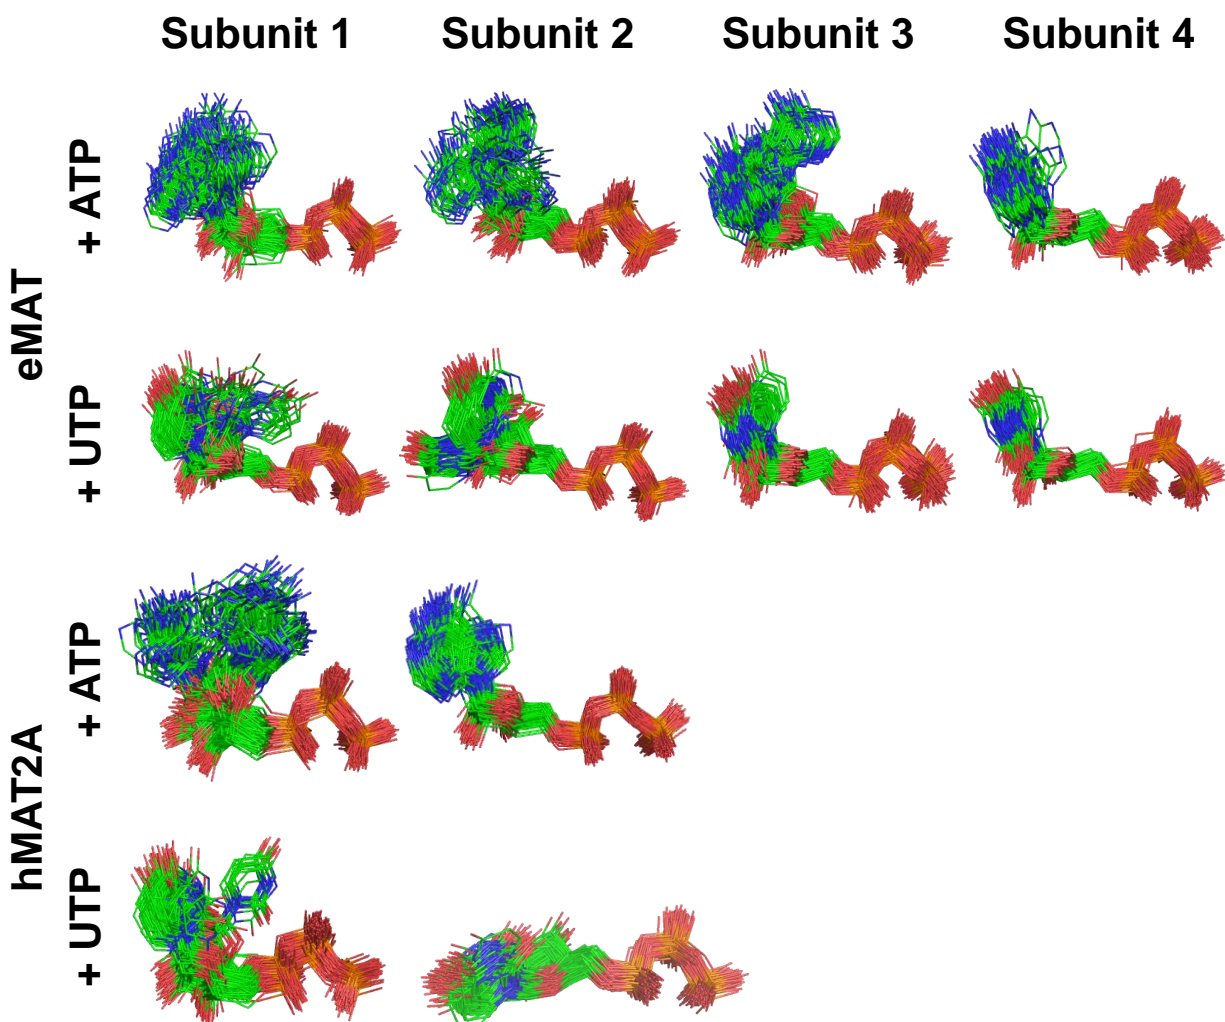

**Figure S11. MD substrate ensembles of ATP or UTP bound to eMAT or hMAT2A.** Representative substrate ensembles are shown, each consisting of 150 structures sampled evenly over triplicate 500 ns open state simulations. A protein backbone alignment was used to demonstrate substrate flexibility and conformational variability in the context of the enzyme active site pocket. As the multimeric eMAT and hMAT2A models possess four and two independent active sites, respectively, the substrate poses from each subunit are represented separately.

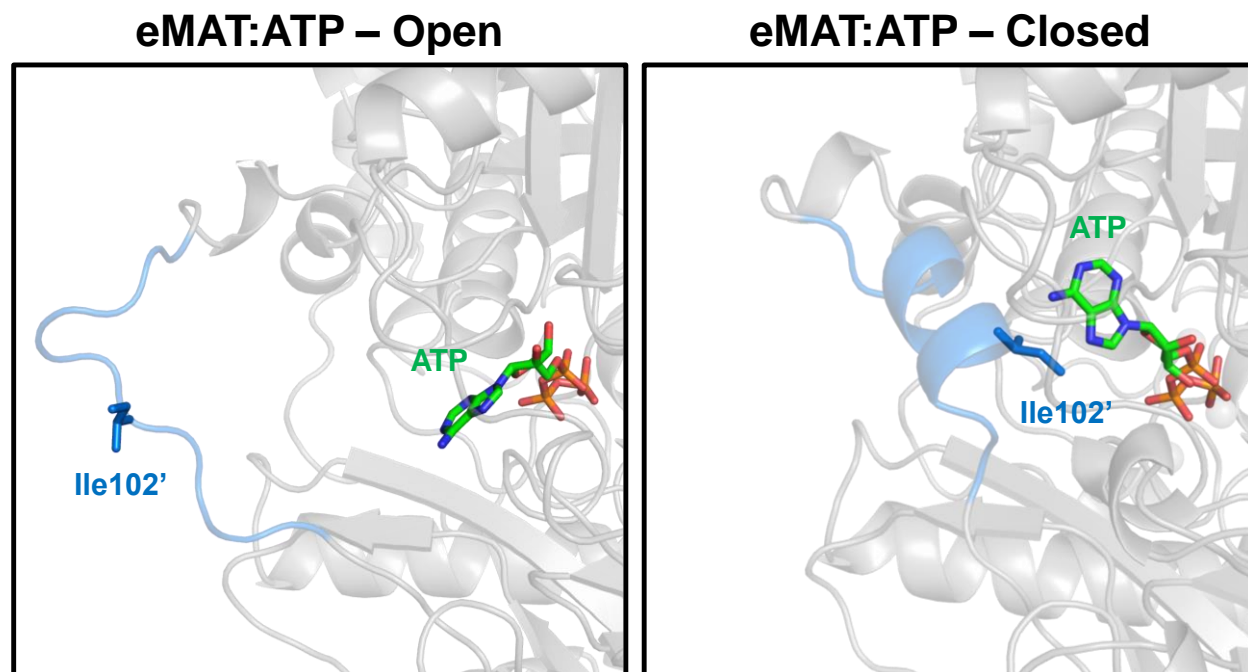

**Figure S12. Position of Ile102' in the open and closed active site loop conformations.** The position of Ile102' in eMAT:ATP is shown relative to the nucleotide binding site in an arbitrarily selected open state frame and the closed state input structure. In the closed state of the active site loop, this residue is positioned to interact with the nucleobase. In the open state, however, Ile102' is positioned considerably further away from the nucleobase, preventing stabilizing interactions from occurring.

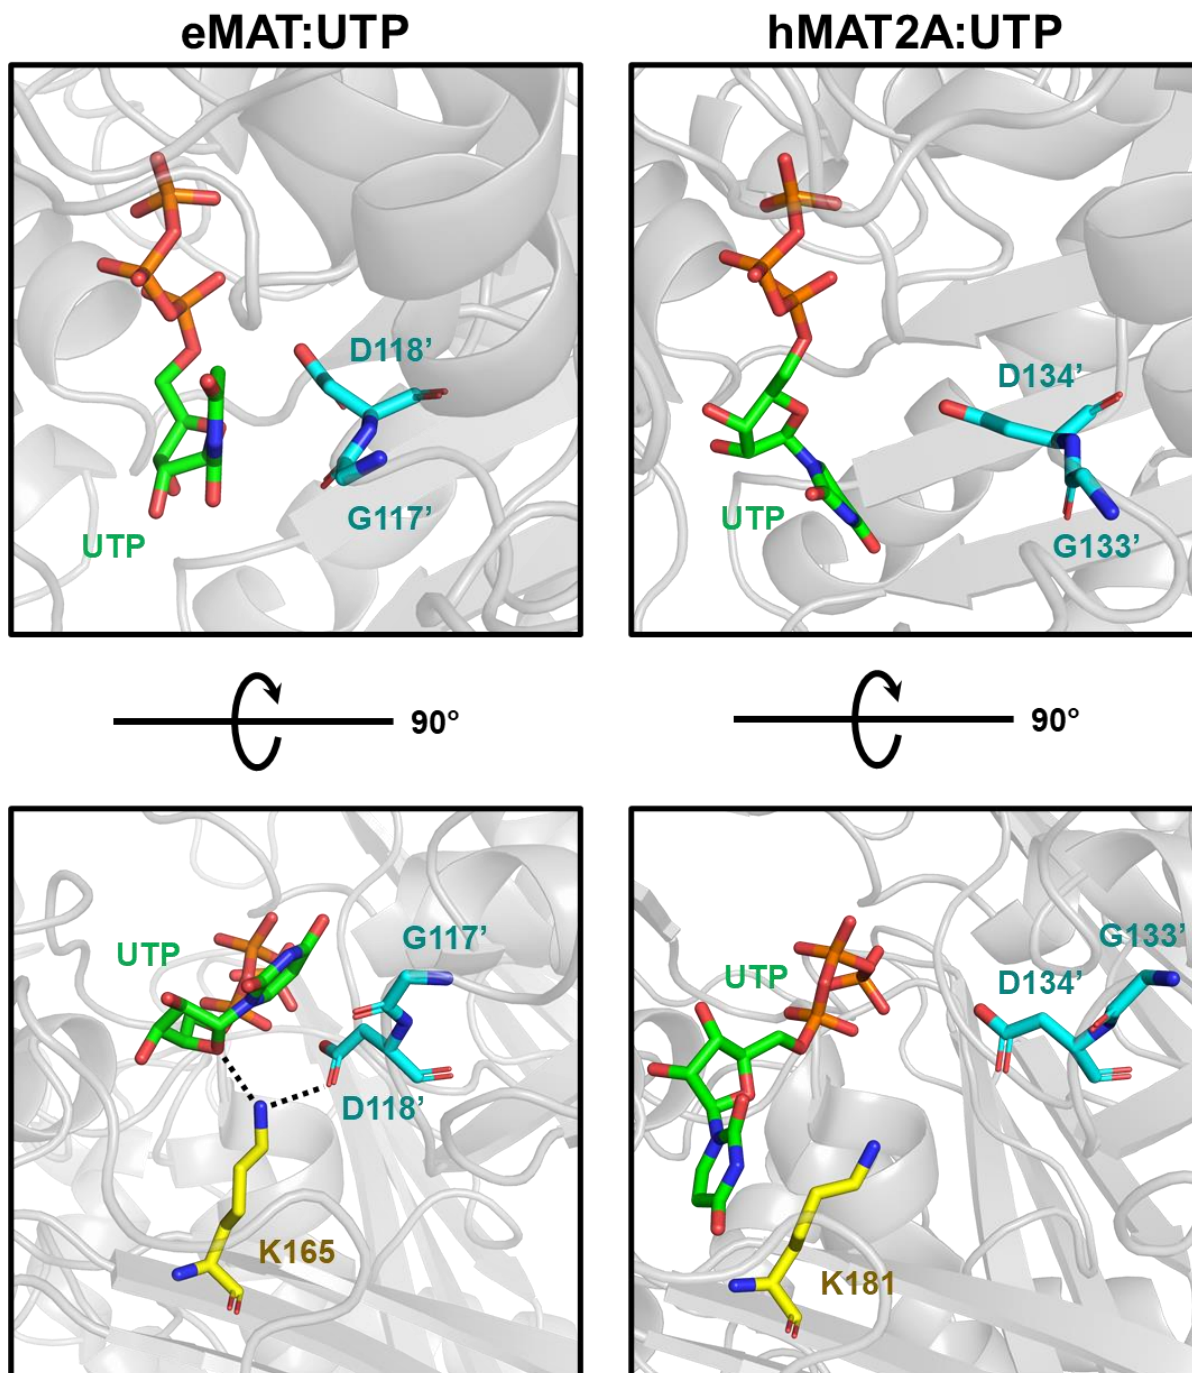

**Figure S13. Enzyme-substrate interactions constrain nucleotide conformations.** Electrostatic interactions between the substrate and first shell enzyme residues dictate the accessible UTP conformational space. In the eMAT open state, the close proximity of Gly117' and Asp118' to the pyrimidine ring force a strained  $\chi$  dihedral eclipsed conformation that is not observed in hMAT2A (Figure 4). This conformation is the result of stabilizing interactions between Lys165, Asp118', and the UTP O4' and O5', shown as dotted lines. In the hMAT2A open state, these residues are positioned further from UTP, allowing for the adoption of more relaxed nucleotide conformations.

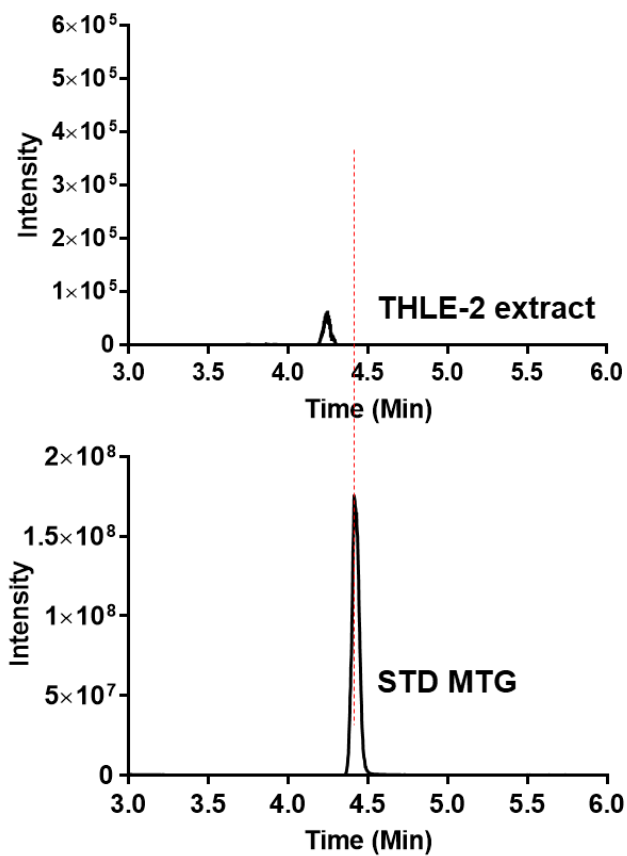

**Figure S14. LC-MS analysis of metabolite from THLE-2.** Extracted chromatograms of the standard MTG, THLE-2 cell extract. THLE-2 cell extract shows absence of MTG. Experiment was performed in biological triplicate.



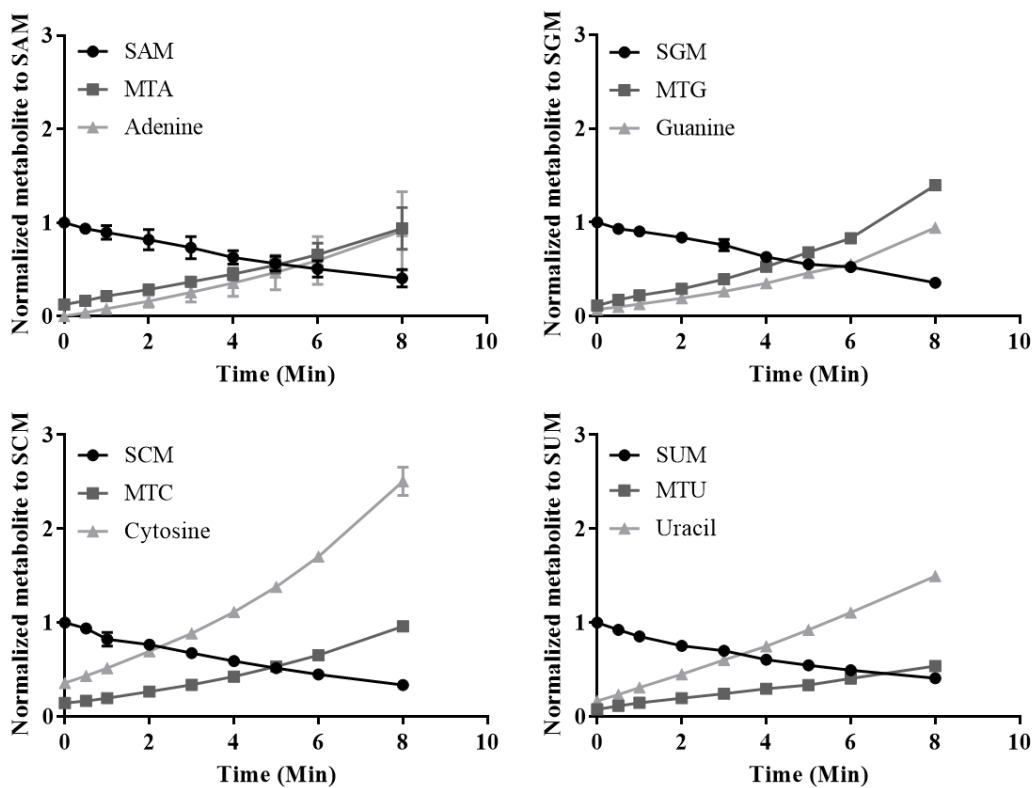

**Figure S15. SNM degradation.** SNM analogs were incubated at 37°C and aliquots were taken every hr. Stability of each sample was tested by UPLC. SNM analog degrades to the corresponding MTN and nucleotide bases with respect to the time. To determine the concentration of SNM analogs at different time points, an area under the curve for SNM is normalized to the initial area of corresponding SNM analogs using UPLC chromatograms. Degradation experiments were run in duplicates and error bars show standard deviation.

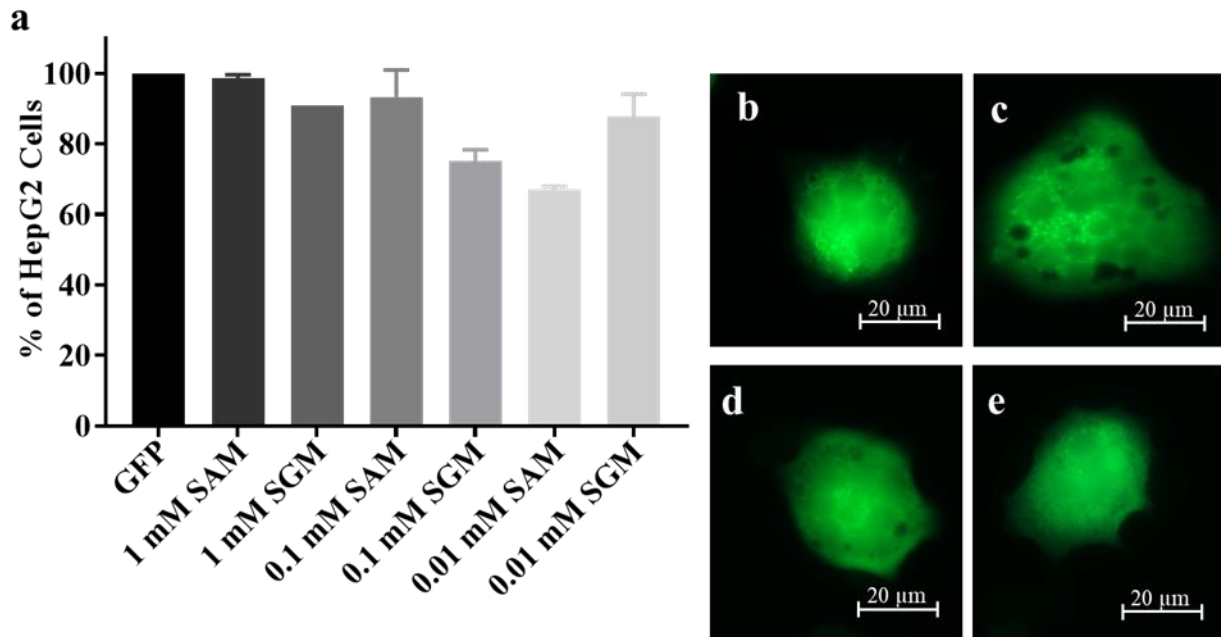

**Figure S16. Electroporation of HepG2 cells.** (a) No change in growth rate was observed when HepG2 cells electroporated with SGM and SAM with pmaxGFP plasmid. Percentage of cells is normalized to cells electroporated with only pmaxGFP plasmid. HepG2 cells electroporated with pmaxGFP plasmid and with (b) 0.1 mM SGM (c) 0.01 mM SGM (d) 0.1 SAM (e) 0.01 mM SAM.

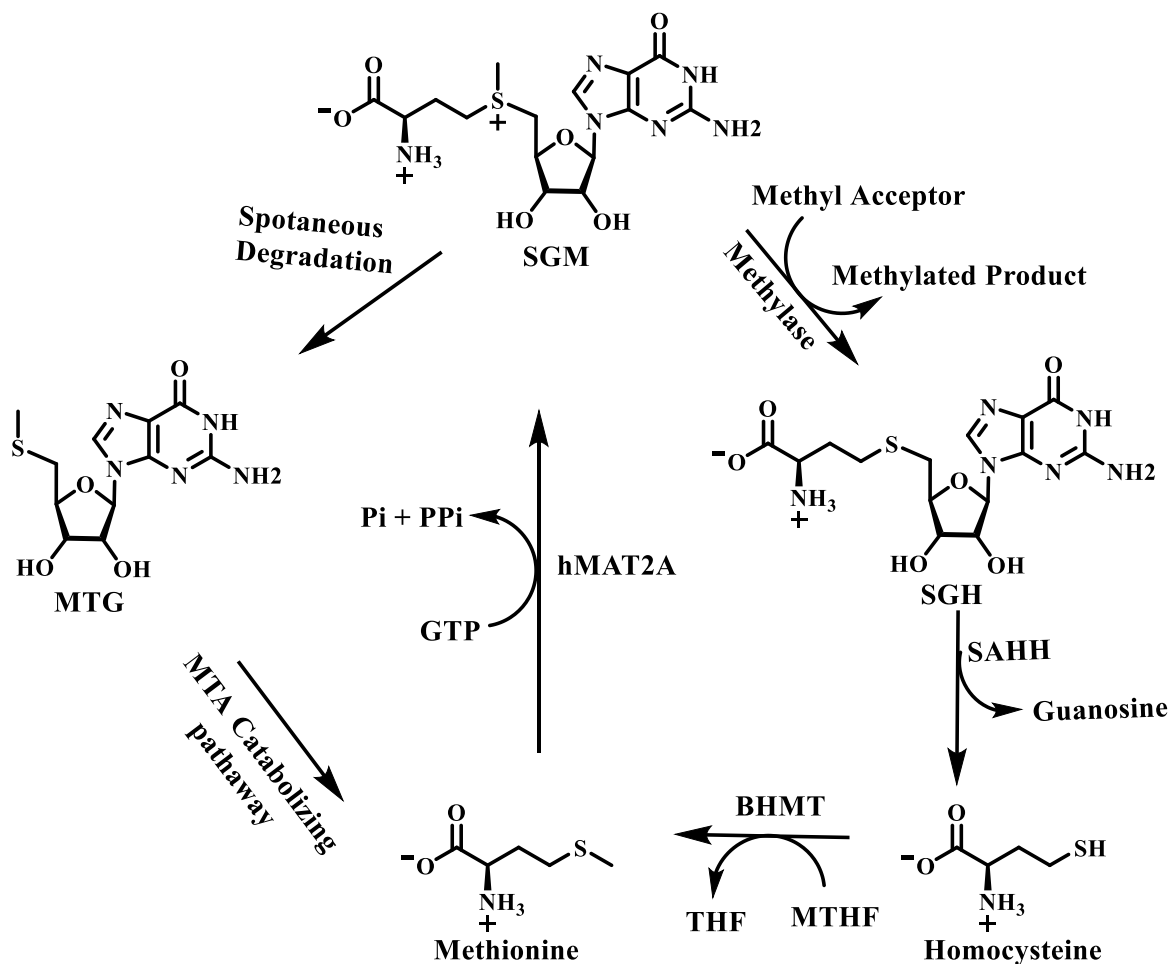

SGM - S-guanosyl-L-methionine, SAHH- S-adenosyl-homocysteine hydrolase  
 BHMT- Betaine-homocysteine S-methyltransferase, MTHF- Methyl-tetrahydrofolate  
 THF- Tetrahydrofolate, MTG- Methylthioguanosine  
 hMAT2A- Human methionine adenosyltransferase 2A

**Figure S17. SGM synthesis and possible downstream pathways.** Human methionine adenosyltransferase 2A (hMAT2A) synthesizing S-guanosyl-methionine (SGM) using methionine and GTP. Methyltransferase utilizing SGM as a methyl source to produce methylated product and side product S-guanosyl-homocysteine (SGH). SGH is hydrolyzed by S-adenosyl-homocysteine hydrolase (SAHH) to give homocysteine and guanine. Homocysteine further methylated by methyltetrahydrofolate using betaine homocysteine S-methyltransferase to give methionine. SGH can be spontaneously degraded into the methyl thioguanine (MTG) which is further catabolize into the methionine.

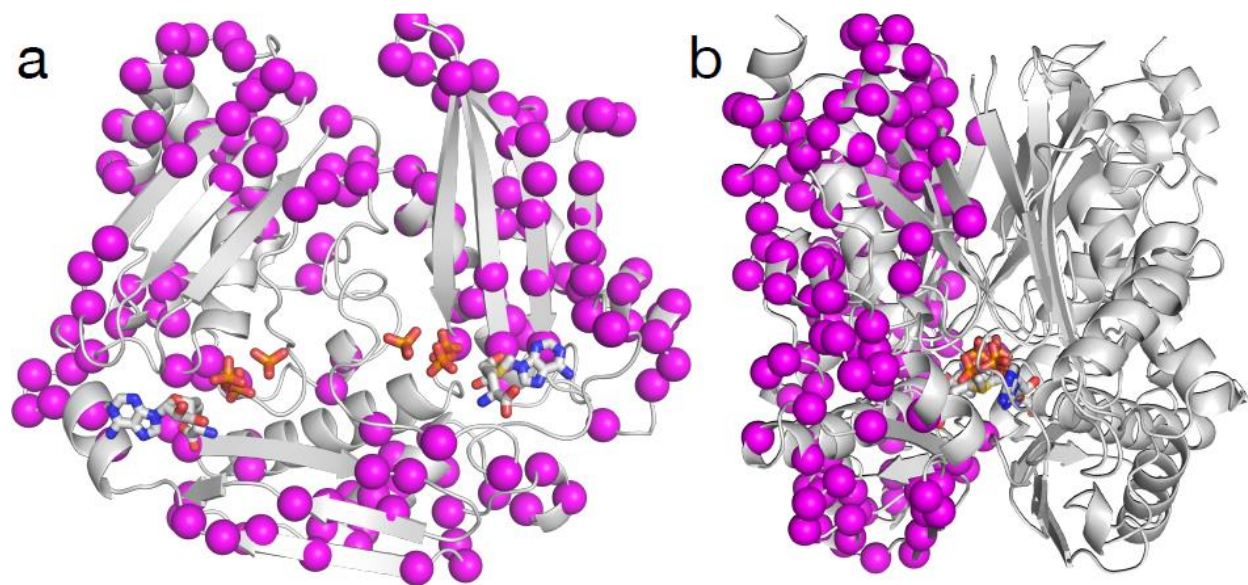

**Figure S18. The locations of sequence differences between eMAT and hMAT2A.** The sequence differences are shown in only one monomer of the dimer for clarity. The residues different in the outer shells (i.e., not substrate binding site) are highlighted as purple spheres. The structure of eMAT is shown in grey cartoon representation and products (SAM, PPI, Pi) are shown as sticks. (a) View of the interface of the monomer (“top” monomer in the dimer is omitted for clarity). (b) Lateral view of the dimer.

**Table S1. Data collection and refinement statistics**

|                                       | eMAT:<br>ATP                 | eMAT:<br>GTP                 | eMAT:<br>CTP                                   | eMAT:<br>UTP                 | eMAT:<br>UppNHp              | eMAT:<br>GppNHp              | hMAT2A:<br>UppNHp            |
|---------------------------------------|------------------------------|------------------------------|------------------------------------------------|------------------------------|------------------------------|------------------------------|------------------------------|
| <b>Data collection</b>                |                              |                              |                                                |                              |                              |                              |                              |
| Space group                           | P2 <sub>1</sub>              | P 6 <sub>1</sub> 22          | P 2 <sub>1</sub> 2 <sub>1</sub> 2 <sub>1</sub> | P 6 <sub>1</sub> 22          | P 6 <sub>1</sub> 22          | P 6 <sub>1</sub> 22          | P 6 <sub>3</sub> 22          |
| Cell dimensions                       |                              |                              |                                                |                              |                              |                              |                              |
| a, b, c (Å)                           | 67.92, 117.78, 113.21        | 122.95, 122.95,<br>288.09    | 100.14, 118.32,<br>144.46                      | 122.60, 122.60,<br>288.83    | 123.65, 123.65,<br>289.41    | 122.34, 122.34,<br>287.27    | 144.70, 144.70,<br>187.69    |
| α,β,γ (°)                             | 90.00, 107.52, 90.00         | 90.00, 90.00, 120.00         | 90.00, 90.00, 90.00                            | 90.00, 90.00,<br>120.00      | 90.00, 90.00,<br>120.00      | 90.00, 90.00,<br>120.00      | 90.00, 90.00,<br>120.00      |
| Resolution (Å)                        | 39.79-1.95 (1.98-<br>1.95)   | 39.86-2.39 (2.46-<br>2.39)   | 39.44 - 1.89 (1.92-<br>1.89)                   | 39.75-2.25 (2.31-<br>2.25)   | 43.98-2.24 (2.30-<br>2.24)   | 43.65-2.50 (2.59-<br>2.50)   | 39.37-2.55 (2.66-<br>2.55)   |
| R <sub>merge</sub>                    | 0.151 (2.148)                | 0.258 (5.319)                | 0.084 (2.114)                                  | 0.150 (4.079)                | 0.114 (6.060)                | 0.160 (4.254)                | 0.182 (7.635)                |
| R <sub>pim</sub>                      | 0.061 (0.856)                | 0.009 (0.851)                | 0.033 (0.891)                                  | 0.028 (0.757)                | 0.019 (1.025)                | 0.026 (0.675)                | 0.035 (1.537)                |
| I / σI                                | 8.2 (1.1)                    | 15.5 (1.0)                   | 13.8 (0.8)                                     | 14.2 (1.1)                   | 19.6 (0.7)                   | 16.2 (1.1)                   | 10.4 (0.4)                   |
| CC(1/2)                               | 0.998 (0.445)                | 0.999 (0.434)                | 0.999 (0.412)                                  | 0.998 (0.549)                | 1.000 (0.385)                | 0.999 (0.622)                | 0.999 (0.571)                |
| Completeness (%)                      | 99.9 (99.8)                  | 100.0 (100)                  | 99.9 (99.8)                                    | 100.0 (100)                  | 100 (100)                    | 100 (100)                    | 99.8 (99.7)                  |
| Multiplicity                          | 7.0 (7.2)                    | 39.4 (39.8)                  | 7.5 (6.3)                                      | 30.3 (30.5)                  | 38.0 (35.5)                  | 39.1 (40.3)                  | 27.0 (25.0)                  |
| <b>Refinement</b>                     |                              |                              |                                                |                              |                              |                              |                              |
| Resolution (Å)                        | 35.99-1.95 (2.02-<br>1.95)   | 38.39-2.39 (2.475-<br>2.39)  | 38.22-1.89 (1.958-<br>1.89)                    | 39.09-2.25 (2.33-<br>2.25)   | 43.98-2.24 (2.32-<br>2.24)   | 43.63-2.5 (2.59-2.5)         | 39.40-2.50 (2.56-<br>2.50)   |
| Unique reflections                    | 123330 (12236)               | 51784 (5068)                 | 137216 (13509)                                 | 61629 (6043)                 | 63616 (6212)                 | 44820 (4383)                 | 40352 (2445)                 |
| R <sub>work</sub> / R <sub>free</sub> | 17.02/20.66<br>(30.90/32.29) | 18.22/21.57<br>(30.47/32.88) | 16.59/19.51<br>(31.49/35.29)                   | 18.96/21.08<br>(29.30/33/18) | 21.24/23.46<br>(34.44/38.08) | 22.29/24.35<br>(24.35/40.13) | 21.94/24.59<br>(48.57/52.77) |
| No. atoms                             | 12593                        | 6030                         | 12542                                          | 6140                         | 6069                         | 6023                         | 6146                         |
| Protein                               | 11854                        | 5831                         | 11671                                          | 5921                         | 5859                         | 5894                         | 6064                         |
| Ligand/ion                            | 104                          | 66                           | 148                                            | 62                           | 77                           | 49                           | 54                           |
| Water                                 | 635                          | 133                          | 633                                            | 157                          | 133                          | 80                           | 28                           |
| <b>B-factors</b>                      |                              |                              |                                                |                              |                              |                              |                              |
| Protein                               | 61.77                        | 67.34                        | 46.05                                          | 70.46                        | 97.25                        | 95.26                        | 103.91                       |
| Ligand/ion                            | 55.53                        | 81.00                        | 51.54                                          | 85.01                        | 135.89                       | 115.98                       | 112.22                       |
| Water                                 | 51.78                        | 61.54                        | 46.50                                          | 65.37                        | 77.40                        | 74.58                        | 97.28                        |
| <b>R.m.s. deviations</b>              |                              |                              |                                                |                              |                              |                              |                              |
| Bond lengths (Å)                      | 0.011                        | 0.003                        | 0.010                                          | 0.006                        | 0.004                        | 0.002                        | 0.002                        |
| Bond angles (°)                       | 0.98                         | 0.61                         | 1.04                                           | 0.80                         | 0.60                         | 0.58                         | 0.57                         |
| PDB ID                                | 7LOO                         | 7LOW                         | 7LO2                                           | 7LOZ                         | 7LL3                         | 7LNN                         | 7LNH                         |

\*All data from single crystals. \*Values in parentheses are for highest-resolution shell.

**Table S2. Concentrations of NTPs in human<sup>1</sup> normal and cancer cells, E. coli (mid log phase)<sup>2</sup>.**

| <b>NTP</b> | <b>Normal human cells<br/>(mM)</b> | <b>Cancer human cells<br/>(mM)</b> | <b>E. coli (mM)</b> |
|------------|------------------------------------|------------------------------------|---------------------|
| <b>ATP</b> | 2.537                              | 3.134                              | 3.560               |
| <b>GTP</b> | 0.232                              | 0.473                              | 1.660               |
| <b>CTP</b> | 0.083                              | 0.402                              | 0.325               |
| <b>UTP</b> | 0.227                              | 0.686                              | 0.667               |

**Table S3. The Primers used for mutagenesis of Ser247Thr hMAT2A and Thr227Ser eMAT mutant.**

| <b>Name</b>             | <b>Froward Primer<sup>#</sup></b>                        | <b>Reverse Primer</b>                     |
|-------------------------|----------------------------------------------------------|-------------------------------------------|
| Ser247Thr hMAT2A mutant | 5'-<br>CAGCCG <b><u>ACC</u></b> GGTCGTTTCG<br>TTATCGG-3' | 5'-<br>CAGATGATAGATGGTGTCCT<br>CGTCGAG-3' |
| Thr227Ser eMAT mutant   | CTTCATCAACCCG <b><u>TCT</u></b> GGT<br>CGTTTCGTTA        | AATTTGGTGGCAGAAGTCAG<br>CCA               |

<sup>#</sup>Bold underlined codon in forward primer used for changing Ser to Thr and Thr to Ser.



tattgtttatTTTTctaaatacattcaaatatgtatccgctcatgaattaattcttagaaaaactcatcgagcatcaaatgaaactgcaatttattcata  
tcaggattatcaataccatatttttgaaaaagccgtttctgtaataaggagaaaactcaccgaggcagttccataggatggcaagatcctggt  
atcggctcgcgattccgactcgtccaacatcaatacaacctattaatttcccctcgtcaaaaataaggttatcaagtgagaaatccatgagtg  
acgactgaatccggtgagaatggcaaaagtattgcatttctccagactgttcaacaggccagccattacgctcgtcatcaaaatcactcg  
catcaaccaaaccgftattcattcgtgattgcgctgagcgagacgaaatacgcgatcgtgttaaaggacaattacaacaggaatcgaa  
tgcaaccggcgcaggaacactgccagcgcatacaaattttaccgtaacaggatatttcttaataacctggaatgctgttttccggggga  
tcgagtggtgagtaaccatgcatcatcaggagtaggataaaatgcttgatggctggaagaggcataaattccgctcagccagtttagtctga  
ccatctcatctgtaacatcattggcaacgctacctttgccatgtttcagaacaactctggcgcatcgggcttccatacaatcgatagattgct  
gcacctgattgcccacattatcgcgagcccattataccataaaatcagcatccatgttggaaftaatcgcggcctagagcaagacgtt  
cccgtgaaatggtcataacacccttgattactgtttatgtaagcagacagtttattgttcatgacaaaaatcccttaacgtgagtttctgct  
cactgagcgtcagaccccgtagaaaagatcaaaggatcttctgagatcctttttctgcgcgtaatctgctgcttgaaca aaaaaaccac  
cgctaccagcgggtggttttccggatcaagagctaccaactcttttccgaaggtaactggcttcagcagagcgcagataccaaatactg  
tcttctagttagccgtagttaggccaccactcaagaactctgtagcaccgctacatacctcgtctgtaactctgttaccagtggctgct  
gccagtggcgataagtcgtgtcttaccgggtggactcaagacgatagttaccggataaggcgcagcggctcgggctgaacgggggggtc  
tgcacacagcccagcttgagcgaacgacctacaccgaactgagatacctacagcgtgagctatgagaaagcggcacgcttcccgaagg  
gagaaaggcggacaggtatccggtgaagcggcagggctggaacaggagagcgcacgagggagcttccagggggaacgcctggtatct  
ttatagtcctgctcgggttccgacctctgacttgagcgtcgtttttgtagctcgtcagggggggcggagcctatggaaaaacgccagcaa  
cgcggccttttacggttctggccttttctggccttttctcacatgttcttctcgttaccctgattctgtggataaccgtattaccgcttt  
gagtgagctgataccgctcggcagccgaacgaccgagcgcagcagtgagtgagcaggaagcgggaagagcgcctgatgcgggtat  
tttctcttacgcatctgtgcggtatttccaccgcataatgtgctcactcagtaacaatctgctctgatccgcatagtttaagccagtatacact  
ccgctatcgtactgactgggtcatggtgctgccccgacaccgccaacaccgctgacgcgcctgacgggcttctgctccccgca  
tccgcttacagacaagctgtgaccgtctccgggagctgcatgttcagaggttttaccgctatcaccgaaacgcgcgaggcagctgcggt  
aaagctcatcagcgtggtcgtgaagcgattcacagatgtctgcctgttcatccgcgtccagctcgttgagtttctccagaagcgttaatgtctg  
gcttctgataaagcgggcatgtaaggcgggttttctgtttgctactgatgcctccgtgtaagggggatttctgttcatgggggtaatgat  
accgatgaaacgagagaggatgctcacgatacgggttactgatgatgaacatcccggttactggaacgttgtgagggtaacaactggc  
ggtatggatcggcgggaccagagaaaaatcactcagggtaatgccagcgttcgtaatacagatgtaggtgtccacagggtagcca  
gcagcatcctgcgatgcagatccggaacataatggtgcagggcgtgacttccgcgttccagactttacgaaacaggaaaccgaagac  
cattcatgttgtgctcaggtcgcagacgtttgcagcagcagtcgcttccagctcgcgtatcgggtgattcattctgtaaccagtaaggc  
aaccgccagcctagccgggtctcaacgacaggagcacgatcatgctcaccgctggggccgcatgccggcgataatggcctgctt  
tcgccgaaacgtttggtggcgggaccagtgacgaaggcttgagcagggcgtgcaagattccgaataccgaaagcgcagggccgatcat  
cgtcgcgctccagcgaagcggctctcggcaaaatgaccagagcgtgcccggcacctgtcttacgagttgcatgataaagaagacag



tcataagtgcggcgacgatagtcatgccccgcgccaccggaaggagctgactgggtgaaggctctcaagggcatcggtcgagatccc  
ggtgcctaagtgagtgactaacctacattaattgcgttgctcactgcccgtttccagtcgggaaacctgctgctgccagctgcatatgaat  
cggccaacgcgcggggagagggcgtttgctattgggcgccaggggtgtttttccaccagtgagacgggcaacagctgattgcctt  
caccgctggccctgagagagttgcagcaagcgggtccacgctggtttgccccagcaggcgaatctgtttgatggtggttaacggcgg  
gatataacatgagctgtcttcggtatcgtcgtatcccactaccgagatatccgcaccaacgcgcagccccggactcggtaatggcgcgattg  
cggccagcggccatctgatcgttggaaccagcatcgcagtgggaaacgatgccctcattcagcatttgcatggtttgtaaaccggacatg  
gcactccagtcgcttcccgttccgctatcggctgaatttgattgcgagtgagatattatgccagccagccagacgcagacgcgccgagac  
agaacttaattggccccgtaacagcgcgatttgctggtgaccaatgcgaccagatgctccacgccagtcgctaccgttctatgggag  
aaaataactgttgatgggtgctggtcagagacatcaagaaataacgccggaacattagtgcaggcagctccacagcaatggcctcctg  
gtcatccagcggatagttaatgatcagcccactgacgcgttgcgcgagaagattgtgcaccgccgtttacaggttcgacgccgcttctgtt  
ctaccatcgacaccaccagctggcaccagttgatcggcgcgagatttaacgccgcgacaattgacgagcgcgctgcagggccaga  
ctggaggtggcaacccaatcagcaacgactgtttgccgccagttgttgccacgcggttgggaatgtaattcagctccgccatcgccg  
cttccacttttcccgcgttttcgagaacgtggctggcctggtaccacgcgggaaacggctctgataagagacaccggcactactctgca  
catcgtataacgttactggttccattcaccacctgaattgactcttccgggcctatcatgccataaccgcgaaaggtttgcgccattcga  
tggtgtccgggatctcgacgctctcccttatgcgactcctgattaggaagcagcccagtagtaggttagggcgttgagcaccgccgccg  
caaggaatggtgatgcaaggagatggcgcaccaacagctccccggccacgggctgccaccataccacgccgaaacaagcgtcat  
gagcccgaagtggcgcgagcccgatcttcccacgtgatgctggcgatagggcggcagcaaccgcacctgtggcgcgggtgatgccgg  
ccacgatgctccggcgtagaggatcgagatctgatccccgcaaa

### **eMAT plasmid sequence**

ttaatcagactcactataggggaattgtgagcggataacaattcccctctagaataattttgttaactttaagaaggagatataccatgggca  
gcagccatcatcatcatcacagcagcggcctggtcccgcgcggcagccatATGGCAAACACCTTTTTACGTC  
CGAGTCCGTCTCTGAAGGGCATCCTGACAAAATTGCTGACCAAATTTCTGATGCCGT  
TTTAGACGCGATCCTCGAACAGGATCCGAAAGCACGCGTTGCTTGCGAAACCTACGT  
AAAAACCGGCATGGTTTTAGTTGGCGGCGAAATCACCACCAGCGCCTGGGTAGACA  
TCGAAGAGATCACCCGTAACACCGTTCGCGAAATTGGCTATGTGCATTCCGACATGG  
GCTTTGACGCTAACTCCTGTGCGGTTCTGAGCGCTATCGGCAAACAGTCTCCTGACA  
TCAACCAGGGCGTTGACCGTGCCGATCCGCTGGAACAGGGCGCGGGTGACCAGGGT  
CTGATGTTTGGCTACGCAACTAATGAAACCGACGTGCTGATGCCAGCACCTATCACC

TATGCACACCGTCTGGTACAGCGTCAGGCTGAAGTGCGTAAAAACGGCACTCTGCC  
GTGGCTGCGCCCGGACGCGAAAAGCCAGGTGACTTTTCAGTATGACGACGGCAAAA  
TCGTTGGTATCGATGCTGTCGTGCTTTCCACTCAGCACTCTGAAGAGATCGACCAGA  
AATCGCTGCAAGAAGCGGTAATGGAAGAGATCATCAAGCCAATTCTGCCCCGCTGAA  
TGGCTGACTTCTGCCACCAAATTCTTCATCAACCCGACCGGTCGTTTCGTTATCGGTG  
GCCAATGGGTGACTGCGGTCTGACTGGTCGTAAAATTATCGTTGATACCTACGGCG  
GCATGGCGCGTCACGGTGGCGGTGCATTCTCTGGTAAAGATCCATCAAAAGTGGAC  
CGTTCCGCAGCCTACGCAGCACGTTATGTCGCGAAAAACATCGTTGCTGCTGGCCTG  
GCCGATCGTTGTGAAATTCAGGTTTCTACGCAATCGGCGTGGCTGAACCGACCTCC  
ATCATGGTAGAACTTTTCGGTACTGAGAAAGTGCCTTCTGAACAACCTGACCCTGCTG  
GTACGTGAGTTCTTCGACCTGCGCCCATACGGTCTGATTCAGATGCTGGATCTGCTG  
CACCCGATCTACAAAGAAACCGCAGCATAACGGTCACTTTGGTCGTGAACATTTCCCG  
TGGGAAAAAACCGACAAAGCGCAGCTGCTGCGCGATGCTGCCGGTCTGAAGTAAActc  
gagcaccaccaccaccactgagatccggctgctaacaagcccgaaggaagetgagttggctgctgccaccgctgagcaataact  
agcataacccttggggcctctaaacgggtcttgaggggtttttgctgaaaggaggaactatatccggattggcgaatgggacgcgcctg  
tagcggcgcattaagcgcggcggtgtgtgtgttacgcgcagegtgaccgctacacttgcagcgcctagegcccgtcctttcgtttct  
tcccttctttctgccacgttcgccggtttccccgtcaagctctaaatcgggggctcccttagggttccgatttagtctttacggcacctg  
accccaaaaaacttgattagggatggttcacgtagtgggccatgcacctgatagacggttttcgcctttgacgttgagtcacgtcttt  
aatagtggactcttgttccaaactggaacaacactcaacctatctcggctctattctttgattataagggttttggcgatttcggcctattggtta  
aaaaatgagctgatttaacaaaaattaacgcgaattttaacaaaatattaacgtttacaatttcagggtggcactttcggggaaatgtcgcggg  
aacccctattgtttattttctaaatacattcaaatatgtatccgctcatgaattaattcttagaaaaactcatcgagcatcaaatgaaactgcaattt  
attcatatcaggattatcaataccatattttgaaaaagccgtttctgtaatgaaggagaaaactcaccgaggcagttccataggatggcaagat  
cctggtatcggctcgcgattccgactcgtccaacatcaatacaacctattaattccctcgtcaaaaaataagggtatcaagtgagaaatcaca  
tgagtgcgactgaatccgggtgagaatggcaaaagtttatgcatttcttccagacttgttcaacaggccagccattacgctcgtcatcaaaatc  
actcgcacatcaacaaaccgttattcattcgtgattgcgcctgagcgcgagacgaaatacgcgatcgtgtttaaaggacaattacaaacaggaa  
tcgaatgcaaccggcgcaggaacactgccagcgcacatcaacaatatttcacctgaatcaggatattcttcaataacctggaatgctgtttccc  
ggggatcgcagtggtgagtaacctgcatcatcaggagtagcgataaaatgcttgatggtcggaagaggcataaattccgtcagccagttta  
gtctgaccatctcatctgtaacatcattggcaacgctacctttgcatgtttcagaacaactctggcgcacatcgggcttccatacaatcgatag  
attgtcgcacctgattgcccacattatcgcgagcccatttataccatataaatcagcatccatgttggaaatthaatcgggcctagagcaag  
acgtttcccgttgaatatggctcataacacccttgtattactgtttatgtaagcagacagttttattgttcatgacaaaaatcccttaacgtgagttt  
ctgttccactgagcgtcagaccctgtagaaaagatcaaggtatcttctgagatcctttttctgcgcgtaactctgctgcttgcacaaaaaa

accaccgctaccagcgggtggtttgttgcggatcaagagctaccaactcttttccgaagg taactggctcagcagagcgcagataccaa  
atactgtccttctagtgtagccgtagttaggccaccacttcaagaactctgtagcaccgctacatacctcgcctgctaactctgttaccagt  
gctgctgccagtggcgataagtcgtgtcttaccgggttgactcaagacgatagttaccggataaggcgcagcggctgggctgaacgggg  
ggttcgtgcacacagcccagcttgagcgaacgacctacaccgaactgagatacctacagcgtgagctatgagaaagcggcagctccc  
gaagggagaaaaggcggacaggtatccggtaagcggcagggctggaacaggagagcgcacgaggaggctccagggggaaacgcct  
ggtatctttatagctctgctgggttcgccacctctgacttgagcgtcgatftttgtgatgctcgtcagggggcgaggcctatggaaaaacgc  
cagcaacgcggccttttacggctcctggccttttctgacatgttcttctgcgttatcccctgattctgtggataaccgtattac  
cgctttgagtgagctgataccgctcggcagccgaacgaccgagcgcagcagtgagtgagcaggaagcgggaagagcgcctgat  
gcggtatfttctcttacgcatctgtgcggtattcacaccgcatataggtgcactctcagtacaatctgctctgatccgcatagftaacgag  
tataactccgctatcgtactgactgggtcatggctgcgccccgacaccgccaacaccgctgacgcgccctgacgggcttctgct  
cccggcatccgcttacagacaagctgtgaccgtctccgggagctgcatgtgacagaggtttaccgctacaccgaaacgcgcgaggca  
gctgcggtaaagctcatcagcgtggctgtaagcgattcacagatgtctgcttcatccgctccagctcgttgaattctccagaagcgtt  
aatgtctgctctgataaagcgggccatgtaaggcgggttttctctgttgctactgatgctccgtgtaagggggatttctgttcatgggg  
gtaatgataccgatgaaacgagagaggtgctcacgatacgggttactgatgatgaacatgcccggttactggaacgttgtagggtaaac  
aactggcggatggatgcggcgggaccagagaaaaatacactcagggtcaatgcagcgcctcgttaatacagatgtaggtgtccacagg  
gtaccagcagcatcctgcgatgcagatccggaacataatggtgcagggcgtgacttccgcttccagactttacgaaacagcggaaac  
gaagaccattcatgttgtgctcaggtcgcagacgtttgcagcagcagtcgcttcacgttcgctcgcgtatcgggtattcattctgctaaccg  
taaggcaaccccggcagcctagccgggtcctcaacgacaggagcacgatcatgcgcaccctggggcggccatccggcgataatggc  
ctgcttctcggcgaacgtttggtggcgggaccagtgcgaaggcttgagcagggcgtgcaagattccgaataccgcaagcagcagc  
cgatcatcgtcgcgtccagcgaagcggctcctcggcgaataaccagagcgcgtcggcaccctgctcctacgagttgcatgataaga  
agacagtataagtgcggcgcagatagtcatgccccgcgccaccggaaggagctgactgggtgaaagctcacaaggcatcggctga  
gatcccgggtcctaatagtgagtaacttacattaatgcgttgctcactgcccgtttccagtcgggaaacctgctgtccagctgcatt  
aatgaatcggccaacgcgcggggagagcgggttgcgtattggcgccagggtggttttcttaccagtgagcgggcaacagctgat  
tgccctcaccgctggccctgagagagttgcagcaagcggctccacgctggtttgcccagcagggcaaatcctgtttgatggtggttaac  
ggcgggatataacatgagctgtcttgggtatcgtctatcccactaccagataccgcaccaacgcgcagcccggactcggtaatggcgc  
gcattgcgccagcggccatctgatcgttggcaaccagcatgcagtggaacgatgccctcattcagcatttgcattggtttgtgaaaccg  
gacatggcactccagtcgcttcccgttccgctatcgggtgaatttgattgcgagtgagatafttatccagccagccagacgcagacgc  
cgagacagaacttaatggcccgtaacagcgcgatttctggtgacctaatgagaccagatgctccacgcccagtcgctaccgttca  
tgggagaaaataatactgttgatgggtgtctggctcagagacatcaagaaataacgccggaacattagtcagggcagctccacagcaatgg  
catcctggctatccagcggatagftaatgatcagcccactgacgcgttgcgcgagaagattgtgcaccgccctttacaggcttcgacgcc  
cttcttaccatcagaccaccagctggcaccagttgatcggcgcgagatttaacgccgcgacaatttgcagcggcgcgtgcagg

ccagactggaggtggcaacgccaatcagcaacgactgtttgcccgccagttgttgccacgcggtgggaatgtaattcagctccgccatc  
gccgcttccacttttcccgcgttttcgagaaacgtggctggcctggttcaccacgcgggaaacggtctgataagagacaccggcactct  
ggacatcgataacgttactggttcacattcaccacctgaattgactcttccgggcgctatcatgccataaccgcgaaaggtttgcgcca  
ttcgatgggtgccgggatctcgacgctctcccttatgcgactcctgcattaggaagcagcccagtagtaggttagggcgttgagcaccgcc  
gccgcaaggaatggatgcaaggagatggcgccaacagtccccggccacggggcctgccaccatacccacgccgaaacaagcg  
ctcatgagcccgaagtggcgagcccgatctccccatcggatgctggcgatataggcgccagcaaccgcacctgtggcgccggtgatg  
ccggccacgatgcgtccggcgtagaggatcgagatctcgatcccgcgaaa

## Reference

- 1) Traut, T. W., Physiological concentrations of purines and pyrimidines. *Mol Cell Biochem* **1994**, *140* (1), 1-22.
- 2) Buckstein, M. H.; He, J.; Rubin, H., Characterization of nucleotide pools as a function of physiological state in *Escherichia coli*. *J Bacteriol* **2008**, *190* (2), 718-26.
